# Supplementary material for: Sulfonated red and far-red rhodamines to visualize SNAP- and Halo-tagged cell surface proteins
Source: PubMed Central journal article supplement (PMC9346974; doi:10.1039/d1ob02216d), 2022-02-21
Supplement: OB-020-D1OB02216D-s001.pdf [file OB-020-D1OB02216D-s001.pdf]

Supporting Information

## **Sulfonated red and far-red rhodamines to visualize SNAP- and Halo-tagged cell surface proteins**

Ramona Birke<sup>1</sup>, Julia Ast<sup>2,3,4</sup>, Dorien A. Roosen<sup>5</sup>, Joon Lee<sup>6</sup>, Kilian Roßmann<sup>1</sup>, Christiane Huhn<sup>1</sup>, Bettina Mathes<sup>7</sup>, Michael Lisurek<sup>8</sup>, David Bushiri<sup>8</sup>, Han Sun<sup>8</sup>, Ben Jones<sup>9</sup>, Martin Lehmann<sup>5</sup>, Joshua Levitz<sup>6</sup>, Volker Haucke<sup>5</sup>, David J. Hodson<sup>2,3,4,10,\*</sup>, and Johannes Broichhagen<sup>1,7,\*</sup>

<sup>1</sup> Leibniz-Forschungsinstitut für Molekulare Pharmakologie, Berlin, Germany.

<sup>2</sup> Institute of Metabolism and Systems Research (IMSR), University of Birmingham, Birmingham, B15 2TT, UK.

<sup>3</sup> Centre for Endocrinology, Diabetes and Metabolism, Birmingham Health Partners, Birmingham, B15 2TT, UK.

<sup>4</sup> Centre of Membrane Proteins and Receptors (COMPARE), University of Birmingham, Birmingham, UK.

<sup>5</sup> Department of Molecular Pharmacology and Cell Biology, Leibniz-Forschungsinstitut für Molekulare Pharmakologie, Berlin, Germany.

<sup>6</sup> Department of Biochemistry, Weill Cornell Medicine, New York, NY 10065

<sup>7</sup> Department of Chemical Biology, Max Planck Institute for Medical Research, Heidelberg, Germany.

<sup>8</sup> Structural Chemistry and Computational Biophysics, Leibniz-Forschungsinstitut für Molekulare Pharmakologie, Berlin, Germany.

<sup>9</sup> Section of Endocrinology and Investigative Medicine, Imperial College London, London W12 0NN, United Kingdom.

<sup>10</sup> Oxford Centre for Diabetes, Endocrinology and Metabolism, Radcliffe Department of Medicine, University of Oxford, Churchill Hospital, Oxford, UK

\* correspondence should be addressed to: [d.hodson@bham.ac.uk](mailto:d.hodson@bham.ac.uk), [broichhagen@fmp-berlin.de](mailto:broichhagen@fmp-berlin.de)

## Table of Contents

|                                                                                                                                                                                                                                                                                                                                                                 |           |
|-----------------------------------------------------------------------------------------------------------------------------------------------------------------------------------------------------------------------------------------------------------------------------------------------------------------------------------------------------------------|-----------|
| <b>1. General</b>                                                                                                                                                                                                                                                                                                                                               | <b>4</b>  |
| <b>2. Synthesis</b>                                                                                                                                                                                                                                                                                                                                             | <b>5</b>  |
| 2.1. General procedure A for Buchwald-Hartwig coupling and deprotection                                                                                                                                                                                                                                                                                         | 5         |
| 2.2. General procedure B for taurine coupling and deprotection                                                                                                                                                                                                                                                                                                  | 5         |
| 2.3. General procedure C for peptide coupling with TSTU                                                                                                                                                                                                                                                                                                         | 5         |
| 2.4. 4-(tert-Butoxycarbonyl)-2-(3-(3-carboxyazetidin-1-ium-1-ylidene)-6-(3-carboxy-azetidin-1-yl)-3H-xanthen-9-yl)benzoate (2a)                                                                                                                                                                                                                                 | 6         |
| 2.5. 4-Carboxy-2-(3-(3-((2-sulfoethyl)carbamoyl)azetidin-1-ium-1-ylidene)-6-(3-((2-sulfoethyl)carbamoyl)azetidin-1-yl)-3H-xanthen-9-yl)benzoate (3a)                                                                                                                                                                                                            | 6         |
| 2.6. 4-((4-(((2-Amino-9H-purin-6-yl)oxy)methyl)benzyl)carbamoyl)-2-(3-(3-((2-sulfoethyl)carbamoyl)azetidin-1-ium-1-ylidene)-6-(3-((2-sulfoethyl)carbamoyl)-azetidin-1-yl)-3H-xanthen-9-yl)benzoate (BG-Sulfo549)                                                                                                                                                | 7         |
| 2.7. 4-((2-(2-((6-Chlorohexyl)oxy)ethoxy)ethyl)carbamoyl)-2-(3-(3-((2-sulfoethyl)carbamoyl)azetidin-1-ium-1-ylidene)-6-(3-((2-sulfoethyl)carbamoyl)azetidin-1-yl)-3H-xanthen-9-yl)benzoate (CA-Sulfo549)                                                                                                                                                        | 7         |
| 2.8. 4-(tert-Butoxycarbonyl)-2-(3-(3-carboxyazetidin-1-ium-1-ylidene)-7-(3-carboxy-azetidin-1-yl)-5,5-dimethyl-3,5-dihydrodibenzo[b,e]silin-10-yl)benzoate (2b)                                                                                                                                                                                                 | 8         |
| 2.9. 4-Carboxy-2-(5,5-dimethyl-3-(3-((2-sulfoethyl)carbamoyl)azetidin-1-ium-1-ylidene)-7-(3-((2-sulfoethyl)carbamoyl)azetidin-1-yl)-3,5-dihydrodibenzo[b,e]silin-10-yl)benzoate (3b)                                                                                                                                                                            | 8         |
| 2.10. 4-((4-(2-(2-Amino-9H-purin-6-yl)ethyl)benzyl)carbamoyl)-2-(5,5-dimethyl-3-(3-((2-sulfoethyl)carbamoyl)azetidin-1-ium-1-ylidene)-7-(3-((2-sulfoethyl)carbamoyl)azetidin-1-yl)-3,5-dihydrodibenzo[b,e]silin-10-yl)benzoate (BG-Sulfo646)                                                                                                                    | 9         |
| 2.11. 4-((2-(2-((6-Chlorohexyl)oxy)ethoxy)ethyl)carbamoyl)-2-(5,5-dimethyl-3-(3-((2-sulfoethyl)carbamoyl)azetidin-1-ium-1-ylidene)-7-(3-((2-sulfoethyl)carbamoyl)azetidin-1-yl)-3,5-dihydrodibenzo[b,e]silin-10-yl)benzoate (CA-Sulfo646)                                                                                                                       | 9         |
| <b>3. NMR spectra</b>                                                                                                                                                                                                                                                                                                                                           | <b>10</b> |
| 3.1. 4-(tert-Butoxycarbonyl)-2-(3-(3-carboxyazetidin-1-ium-1-ylidene)-6-(3-carboxy-azetidin-1-yl)-3H-xanthen-9-yl)benzoate (2a)                                                                                                                                                                                                                                 | 10        |
| 3.2. 4-Carboxy-2-(3-(3-((2-sulfoethyl)carbamoyl)azetidin-1-ium-1-ylidene)-6-(3-((2-sulfoethyl)carbamoyl)azetidin-1-yl)-3H-xanthen-9-yl)benzoate (3a)                                                                                                                                                                                                            | 11        |
| 3.3. 4-Carboxy-2-(3-(3-((2-sulfoethyl)carbamoyl)azetidin-1-ium-1-ylidene)-6-(3-((2-sulfoethyl)carbamoyl)azetidin-1-yl)-3H-xanthen-9-yl)benzoate (3a)4-((4-(((2-Amino-9H-purin-6-yl)oxy)methyl)benzyl)carbamoyl)-2-(3-(3-((2-sulfoethyl)carbamoyl)azetidin-1-ium-1-ylidene)-6-(3-((2-sulfoethyl)carbamoyl)-azetidin-1-yl)-3H-xanthen-9-yl)benzoate (BG-Sulfo549) | 12        |
| 3.4. 4-((2-(2-((6-Chlorohexyl)oxy)ethoxy)ethyl)carbamoyl)-2-(3-(3-((2-sulfoethyl)carbamoyl)azetidin-1-ium-1-ylidene)-6-(3-((2-sulfoethyl)carbamoyl)azetidin-1-yl)-3H-xanthen-9-yl)benzoate (CA-Sulfo549)                                                                                                                                                        | 13        |
| 3.5. 4-(tert-Butoxycarbonyl)-2-(3-(3-carboxyazetidin-1-ium-1-ylidene)-7-(3-carboxy-azetidin-1-yl)-5,5-dimethyl-3,5-dihydrodibenzo[b,e]silin-10-yl)benzoate (2b)                                                                                                                                                                                                 | 14        |
| 3.6. 4-Carboxy-2-(5,5-dimethyl-3-(3-((2-sulfoethyl)carbamoyl)azetidin-1-ium-1-ylidene)-7-(3-((2-sulfoethyl)carbamoyl)azetidin-1-yl)-3,5-dihydrodibenzo[b,e]silin-10-yl)benzoate (3b)                                                                                                                                                                            | 15        |
| 3.7. 4-((4-(2-(2-Amino-9H-purin-6-yl)ethyl)benzyl)carbamoyl)-2-(5,5-dimethyl-3-(3-((2-sulfoethyl)carbamoyl)azetidin-1-ium-1-ylidene)-7-(3-((2-sulfoethyl)carbamoyl)azetidin-1-yl)-3,5-dihydrodibenzo[b,e]silin-10-yl)benzoate (BG-Sulfo646)                                                                                                                     | 16        |

|           |                                                                                                                                                                                                                                             |           |
|-----------|---------------------------------------------------------------------------------------------------------------------------------------------------------------------------------------------------------------------------------------------|-----------|
| 3.8.      | <i>4-((2-(2-((6-Chlorohexyl)oxy)ethoxy)ethyl)carbamoyl)-2-(5,5-dimethyl-3-(3-((2-sulfoethyl)carbamoyl)azetidin-1-ium-1-ylidene)-7-(3-((2-sulfoethyl)-carbamoyl)azetidin-1-yl)-3,5-dihydrodibenzo[b,e]silin-10-yl)benzoate (CA-Sulfo646)</i> | 17        |
| <b>4.</b> | <b>Protein mass spectrometry</b>                                                                                                                                                                                                            | <b>18</b> |
| <b>5.</b> | <b>Protein constructs</b>                                                                                                                                                                                                                   | <b>19</b> |
| <b>6.</b> | <b>Supplemental Figures</b>                                                                                                                                                                                                                 | <b>20</b> |
| <b>7.</b> | <b>Supplemental Schemes</b>                                                                                                                                                                                                                 | <b>25</b> |
| <b>8.</b> | <b>References</b>                                                                                                                                                                                                                           | <b>26</b> |

## 1. General

All chemical reagents and anhydrous solvents for synthesis were purchased from commercial suppliers (AAT Bioquest, Roth, Sigma-Aldrich, Fluka, Acros, Fluorochem, TCI) and were used without further purification or distillation.

**BG-NH<sub>2</sub>** and **CA-NH<sub>2</sub>** were prepared and obtained as described previously.<sup>[1]</sup>

NMR spectra were recorded in deuterated solvents on a Bruker AVANCE III 600 and calibrated to residual solvent peaks (<sup>1</sup>H in ppm): MeOD-d<sub>4</sub> (3.31). Multiplicities are abbreviated as follows: s = singlet, d = doublet, t = triplet, q = quartet, p = pentet, br = broad, m = multiplet. Coupling constants *J* are reported in Hz. Spectra are reported based on appearance, not on theoretical multiplicities derived from structural information.

LC-MS was performed on an Agilent 1260 Infinity II LC System equipped with Agilent SB-C18 column (1.8 μm, 2.1 × 50 mm). Buffer A: 0.1% FA in H<sub>2</sub>O Buffer B: 0.1% FA acetonitrile. The typical gradient was from 10% B for 0.5 min → gradient to 95% B over 5 min → 95% B for 0.5 min → gradient to 99% B over 1 min with 0.8 mL/min flow.

High resolution mass spectrometry was performed using a Bruker maXis II ETD hyphenated with a Shimadzu Nexera system. The instruments were controlled via Bruker's otofControl 4.1 and Hystar 4.1 SR2 (4.1.31.1) software. The acquisition rate was set to 3 Hz and the following source parameters were used for positive mode electrospray ionization: End plate offset = 500 V; capillary voltage = 3800 V; nebulizer gas pressure = 45 psi; dry gas flow = 10 L/min; dry temperature = 250 °C. Transfer, quadrupole and collision cell settings are mass range dependent and were fine-adjusted with consideration of the respective analyte's molecular weight. For internal calibration sodium format clusters were used. Samples were desalted via fast liquid chromatography. A Supelco Titan<sup>TM</sup> C18 UHPLC Column, 1.9 μm, 80 Å pore size, 20 × 2.1 mm and a 2 min gradient from 10 to 98% aqueous MeCN with 0.1% FA (H<sub>2</sub>O: Carl Roth GmbH + Co. KG ROTISOLV® Ultra LC-MS; MeCN: Merck KGaA LiChrosolv® Acetonitrile hypergrade for LC-MS; FA - Merck KGaA LiChropur® Formic acid 98%-100% for LC-MS) was used for separation. Sample dilution in 10% aqueous ACN (hyper grade) and injection volumes were chosen dependent of the analyte's ionization efficiency. Hence, on-column loadings resulted between 0.25–5.0 ng. Automated internal re-calibration and data analysis of the recorded spectra were performed with Bruker's DataAnalysis 4.4 SR1 software.

Preparative or semi-preparative HPLC was performed on an Agilent 1260 Infinity II LC System equipped with columns as followed: preparative column –ReproSpher 100 C18 columns (10 μm: 50 x 30 mm at 20 mL/min flow rate; semi-preparative column – 5 μm: 250 x 10 mm at 4 mL/min flow rate. Eluents A (0.1% TFA in H<sub>2</sub>O) and B (0.1% TFA in MeCN) were applied as a linear gradient. Peak detection was performed at maximal absorbance wavelength.

Abbreviations: Boc: *tert*-butoxycarbonyl; DIPEA: *N,N*-diisopropylethylamine; DMSO: dimethylsulfoxide; FA: formic acid; HBTU: (2-(1*H*-benzotriazol-1-yl)-1,1,3,3-tetramethyluronium hexafluorophosphate; TFA: trifluoroacetic acid; TSTU: *N,N,N',N'*-Tetramethyl-*O*-(*N*-succinimidyl)uronium tetrafluoroborate.

## 2. Synthesis

### 2.1. General procedure A for Buchwald-Hartwig coupling and deprotection

A flame-dried Schlenk flask was charged with bistriflate **1** (AAT Bioquest, 1.0 equiv.), Pd<sub>2</sub>(dba)<sub>3</sub> (0.2 equiv.), XPhos (0.3 equiv.), Cs<sub>2</sub>CO<sub>3</sub> (4.8 equiv.), and dissolved in dry 1,4-dioxanes (345 equiv.) under an argon atmosphere. Methyl azetidinium 3-carboxylate hydrochloride (3.0 equiv.) was added and the reaction mixture was heated to 80 °C for 4 h. After cooling, MeOH (345 equiv.) and 1 M LiOH (345 equiv.) were added and the reaction was allowed to stir for 1 h at r.t. before it was quenched with 1 mL HOAc. All volatiles were removed in vacuo, the residue taken up in DMSO:MeCN:H<sub>2</sub>O:HOAc (2:1:1:0.02), filtered using a 0.45 µm syringe filter and subjected to RP-HPLC purification.

### 2.2. General procedure B for taurine coupling and deprotection

A 4 mL dram vial was charged with bisacid **2** (1.0 equiv.) dissolved in DMF (2 mg/1 mL) and DIPEA (8.0 equiv.) and TSTU (2.8 equiv.) were combined before taurine (3.0 equiv.) was added in one portion. The reaction mixture was allowed to incubate for 1 h before it was quenched by addition of HOAc (10.0 equiv.) and 10 vol% water and subjected to RP-HPLC purification. The product containing fractions were pooled and lyophilized, and upon dryness redissolved in neat TFA and incubated for 3 h at r.t. before all volatiles were removed under a gentle stream of nitrogen, before subjecting to RP-HPLC purification. The product containing fractions were pooled and lyophilized.

### 2.3. General procedure C for peptide coupling with TSTU

A 4 mL dram vial was charged with acid **3** (1.0 equiv.) dissolved in DMF (2 mg/1 mL) and DIPEA (8.0 equiv.) and TSTU (1.4 equiv.) were combined before either **BG-NH<sub>2</sub>** or **CA-NH<sub>2</sub>** (1.5 equiv.) was added in one portion. The reaction mixture was allowed to incubate for 1 h before it was quenched by addition of HOAc (10.0 equiv.) and 10 vol% water and subjected to RP-HPLC purification. The product containing fractions were pooled and lyophilized to obtain the desired product.

**2.4. 4-(*tert*-Butoxycarbonyl)-2-(3-(3-carboxyazetidinium-1-ylidene)-6-(3-carboxy-azetidinium-1-yl)-3*H*-xanthen-9-yl)benzoate (2a)**

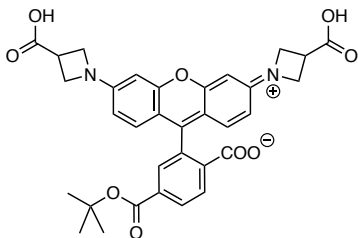

**2a** was prepared according to general procedure A.

bistriflate: **1a** (150 mg, 215  $\mu\text{mol}$ ), yield: 95 mg (74%). Red powder.

$^1\text{H NMR}$  (600 MHz,  $\text{MeOD-d}_4$ ):  $\delta$  [ppm] = 8.40 (d,  $J = 8.2$  Hz, 1H), 8.33 (dd,  $J = 8.2, 1.7$  Hz, 1H), 7.89 (d,  $J = 1.7$  Hz, 1H), 7.11 (m, 2H), 6.77-6.56 (m, 4H), 4.50 (dd,  $J = 10.4, 8.6$  Hz, 4H), 4.42 (dd,  $J = 10.6, 5.9$  Hz, 4H), 3.78-3.54 (m, 2H), 1.59 (s, 9H).

**HRMS** (ESI): calc. for  $\text{C}_{33}\text{H}_{31}\text{N}_2\text{O}_9$   $[\text{M}+\text{H}]^+$ : 599.2024, found: 599.2021.

**2.5. 4-Carboxy-2-(3-(3-((2-sulfoethyl)carbamoyl)azetidinium-1-ylidene)-6-(3-((2-sulfoethyl)carbamoyl)azetidinium-1-yl)-3*H*-xanthen-9-yl)benzoate (3a)**

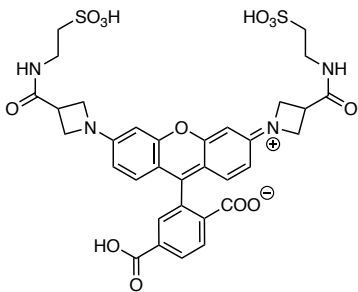

**3a** was prepared according to general procedure B.

acid: **2a** (20 mg, 33.4  $\mu\text{mol}$ ), yield: 12.5 mg (49%). Red powder.

$^1\text{H NMR}$  (600 MHz,  $\text{MeOD-d}_4$ ):  $\delta$  [ppm] = 8.60-8.19 (m, 2H), 7.98 (d,  $J = 1.7$  Hz, 1H), 7.10 (d,  $J = 9.1$  Hz, 2H), 6.80-6.34 (m, 4H), 4.42 (m, 4H), 4.37 (m, 4H), 3.67-3.60 (m, 6H), 3.00 (t,  $J = 6.6$  Hz, 4H).

**HRMS** (ESI): calc. for  $\text{C}_{33}\text{H}_{33}\text{N}_4\text{O}_{13}\text{S}_2$   $[\text{M}+\text{H}]^+$ : 757.1480, found: 757.1476.

**2.6. 4-((4-(((2-Amino-9*H*-purin-6-yl)oxy)methyl)benzyl)carbamoyl)-2-(3-(3-((2-sulfoethyl)carbamoyl)azetidini-1-ium-1-ylidene)-6-(3-((2-sulfoethyl)carbamoyl)-azetidini-1-yl)-3*H*-xanthen-9-yl)benzoate (BG-Sulfo549)**

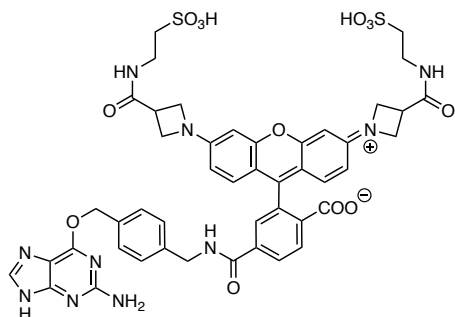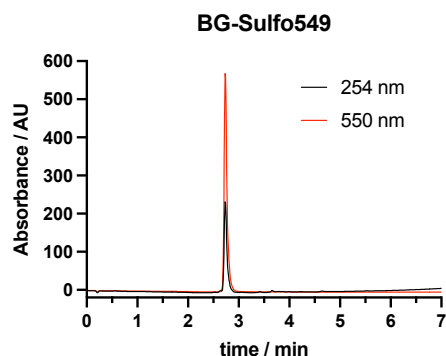

**BG-Sulfo549** was prepared according to general procedure C.

amine: **BG-NH<sub>2</sub>**

acid: **3a** (6.0 mg, 7.9  $\mu\text{mol}$ ), yield: 3.0 mg (38%). Red powder.

<sup>1</sup>H NMR (600 MHz, DMSO-*d*<sub>6</sub>):  $\delta$  [ppm] = 9.29 (s, 1H), 8.65 (s, 1H), 8.30 (d, *J* = 8.3 Hz, 1H), 8.25 (d, *J* = 9.3 Hz, 1H), 8.09 (s, 2H), 7.89 (s, 1H), 7.50 (d, *J* = 8.0 Hz, 2H), 7.36 (d, *J* = 8.0 Hz, 2H), 7.00 (d, *J* = 9.0 Hz, 2H), 6.65 (d, *J* = 9.2 Hz, 2H), 6.63 (s, 1H), 5.55 (s, 2H), 4.50-4.46 (m, 2H), 4.40-4.32 (m, 4H), 4.28-4.20 (m, 4H), 2.60 (t, *J* = 7.2 Hz, 4H). (some protons masked under water peak).

**HRMS** (ESI): calc. for C<sub>46</sub>H<sub>46</sub>N<sub>10</sub>O<sub>13</sub>S<sub>2</sub> [M+2H]<sup>2+</sup>: 505.1338, found: 505.1336.

**2.7. 4-((2-(2-((6-Chlorohexyl)oxy)ethoxy)ethyl)carbamoyl)-2-(3-(3-((2-sulfoethyl)carbamoyl)azetidini-1-ium-1-ylidene)-6-(3-((2-sulfoethyl)carbamoyl)-azetidini-1-yl)-3*H*-xanthen-9-yl)benzoate (CA-Sulfo549)**

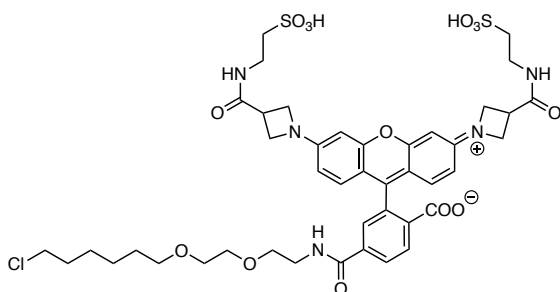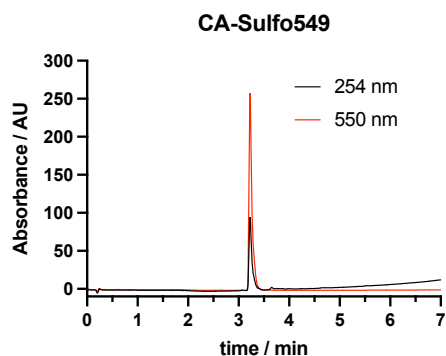

**CA-Sulfo549** was prepared according to general procedure C.

amine: **Halo-NH<sub>2</sub>**

acid: **3a** (6.0 mg, 7.9  $\mu\text{mol}$ ), yield: 4.5 mg (59%). Red powder.

<sup>1</sup>H NMR (600 MHz, MeOD-*d*<sub>4</sub>):  $\delta$  [ppm] = 8.42 (d, *J* = 8.2 Hz, 1H), 8.23 (dd, *J* = 8.3, 1.8 Hz, 1H), 7.85 (s, 1H), 7.12 (s, 1H), 7.10 (s, 1H), 6.67 (dd, *J* = 9.2, 2.2 Hz, 2H), 6.57 (d, *J* = 2.1 Hz, 2H), 4.42 (q, *J* = 8.5 Hz, 4H), 4.37 (q, *J* = 4.8 Hz, 4H), 3.69-3.62 (m, 10H), 3.62-3.56 (m, 4H), 3.55 (t, *J* = 6.6 Hz, 2H), 3.45 (t, *J* = 6.5 Hz, 2H), 3.03 (t, *J* = 6.6 Hz, 4H), 1.74 (p, *J* = 7.1 Hz, 2H), 1.53 (p, *J* = 7.0 Hz, 2H), 1.42 (p, *J* = 5.0 Hz, 2H), 1.38-1.30 (m, 2H).

**HRMS** (ESI): calc. for C<sub>43</sub>H<sub>53</sub>ClN<sub>5</sub>O<sub>14</sub>S<sub>2</sub> [M+H]<sup>+</sup>: 962.2713, found: 962.2721.

**2.8. 4-(*tert*-Butoxycarbonyl)-2-(3-(3-carboxyazetidini-1-ylidene)-7-(3-carboxyazetidini-1-yl)-5,5-dimethyl-3,5-dihydrodibenzo[*b,e*]silin-10-yl)benzoate (2b)**

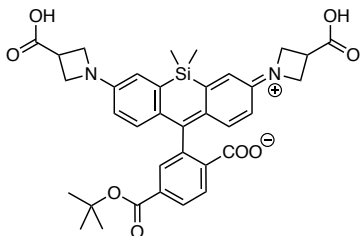

**2b** was prepared according to general procedure A.

bistriflate: **1b** (139 mg, 203  $\mu$ mol), yield: 20.0 mg (37%). Blue powder.

$^1\text{H NMR}$  (600 MHz, MeOD- $d_4$ ):  $\delta$  [ppm] = 8.35–8.01 (m, 2H), 7.71 (d,  $J$  = 1.1 Hz, 1H), 7.01–6.71 (m, 4H), 6.40 (dd,  $J$  = 9.1, 2.6 Hz, 2H), 4.44–4.09 (m, 8H), 3.74–3.48 (m, 2H), 1.57 (s, 9H), 0.64 (s, 3H), 0.55 (s, 3H).

**HRMS** (ESI): calc. for  $\text{C}_{35}\text{H}_{37}\text{N}_2\text{O}_8\text{Si}$  [ $\text{M}+\text{H}$ ] $^+$ : 641.2314, found: 641.2314.

**2.9. 4-Carboxy-2-(5,5-dimethyl-3-(3-((2-sulfoethyl)carbamoyl)azetidini-1-ylidene)-7-(3-((2-sulfoethyl)carbamoyl)azetidini-1-yl)-3,5-dihydrodibenzo[*b,e*]silin-10-yl)benzoate (3b)**

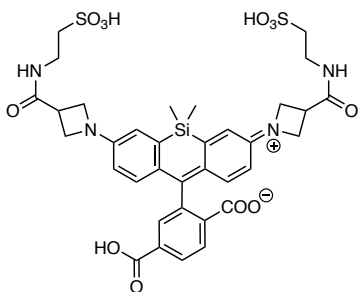

**3b** was prepared according to general procedure B.

acid: **2b** (20.0 mg, 31.3  $\mu$ mol), yield: 12.5 mg (50%). Blue powder.

$^1\text{H NMR}$  (600 MHz, MeOD- $d_4$ ):  $\delta$  [ppm] = 8.36–8.14 (m, 2H), 7.81 (d,  $J$  = 1.7 Hz, 1H), 7.05–6.70 (m, 4H), 6.43–6.19 (m, 2H), 4.59–4.22 (m, 8H), 3.64 (t,  $J$  = 6.6 Hz, 4H), 3.00 (t,  $J$  = 6.6 Hz, 4H), 0.61 (s, 3H), 0.54 (s, 3H).

**HRMS** (ESI): calc. for  $\text{C}_{35}\text{H}_{39}\text{N}_4\text{O}_{12}\text{S}_2\text{Si}$  [ $\text{M}+\text{H}$ ] $^+$ : 799.1770, found: 799.1767.



**2.10.** 4-((4-(2-(2-Amino-9*H*-purin-6-yl)ethyl)benzyl)carbamoyl)-2-(5,5-dimethyl-3-(3-((2-sulfoethyl)carbamoyl)azetidini-um-1-ylidene)-7-(3-((2-sulfoethyl)-carbamoyl)azetidini-1-yl)-3,5-dihydrodibenzo[*b,e*]silin-10-yl)benzoate (BG-Sulfo646)

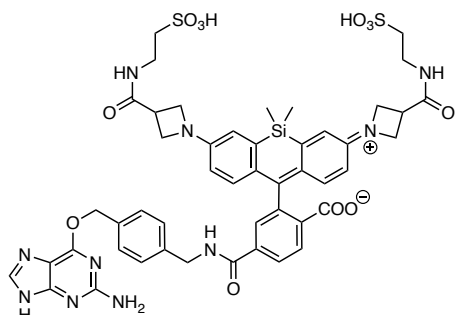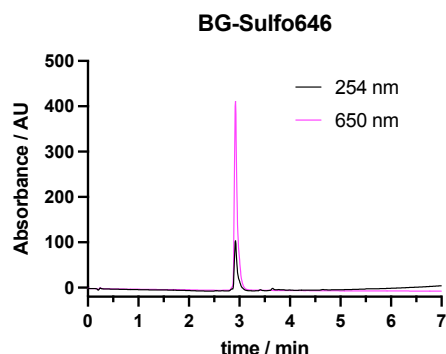

**BG-Sulfo646** was prepared according to general procedure C.

amine: **BG-NH<sub>2</sub>**

acid: **3b** (6.0 mg, 7.5  $\mu$ mol), yield: 2.5 mg (32%). Blue powder.

<sup>1</sup>H NMR (600 MHz, DMSO-*d*<sub>6</sub>):  $\delta$  [ppm] = 9.30 (t, *J* = 5.8 Hz, 1H), 8.12 (d, *J* = 7.9 Hz, 1H), 8.04 (d, *J* = 7.8 Hz, 1H), 7.94 (s, 2H), 7.70 (s, 1H), 7.50 (d, *J* = 7.9 Hz, 2H), 7.34 (d, *J* = 7.9 Hz, 2H), 6.75 (s, 2H), 6.63 (d, *J* = 8.7 Hz, 2H), 6.63 (d, *J* = 8.7 Hz, 2H), 6.36 (d, *J* = 8.7 Hz, 2H), 5.58 (s, 2H), 4.44 (d, *J* = 5.7 Hz, 2H), 4.06-3.93 (m, 4H), 3.88-3.77 (m, 4H), 2.61-2.56 (m, 6H), 2.09 (s, 1H), 2.08 (s, 1H), 1.92 (s, 1H), 1.24 (s, 4H), 0.60 (s, 3H), 0.49 (s, 3H).

HRMS (ESI): calc. for C<sub>48</sub>H<sub>52</sub>N<sub>10</sub>O<sub>12</sub>S<sub>2</sub>Si [M+2H]<sup>2+</sup>: 526.1483, found: 526.1481.

**2.11.** 4-((2-(2-((6-Chlorohexyl)oxy)ethoxy)ethyl)carbamoyl)-2-(5,5-dimethyl-3-(3-((2-sulfoethyl)carbamoyl)azetidini-um-1-ylidene)-7-(3-((2-sulfoethyl)-carbamoyl)azetidini-1-yl)-3,5-dihydrodibenzo[*b,e*]silin-10-yl)benzoate (CA-Sulfo646)

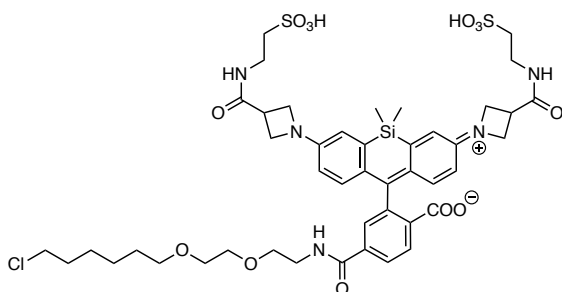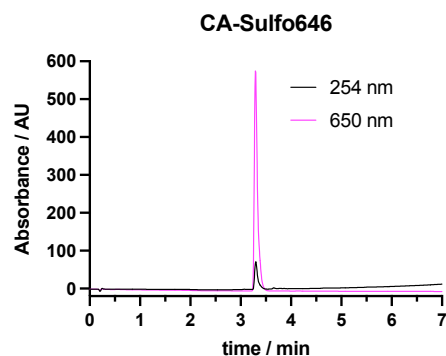

**CA-Sulfo646** was prepared according to general procedure C.

amine: **Halo-NH<sub>2</sub>**

acid: **3b** (6.0 mg, 7.5  $\mu$ mol), yield: 5.2 mg (69%). Blue powder.

<sup>1</sup>H NMR (600 MHz, MeOD-*d*<sub>4</sub>):  $\delta$  [ppm] = 8.42 (d, *J* = 8.2 Hz, 1H), 8.23 (dd, *J* = 8.3, 1.8 Hz, 1H), 7.85 (s, 1H), 7.12 (s, 1H), 7.10 (s, 1H), 6.67 (dd, *J* = 9.2, 2.2 Hz, 2H), 6.57 (d, *J* = 2.1 Hz, 2H), 4.42 (q, *J* = 8.5 Hz, 4H), 4.37 (q, *J* = 4.8 Hz, 4H), 3.69-3.62 (m, 10H), 3.62-3.56 (m, 4H), 3.55 (t, *J* = 6.6 Hz, 2H), 3.45 (t, *J* = 6.5 Hz, 2H), 3.03 (t, *J* = 6.6 Hz, 4H), 1.74 (p, *J* = 7.1 Hz, 2H), 1.53 (p, *J* = 7.0 Hz, 2H), 1.42 (p, *J* = 5.0 Hz, 2H), 1.38-1.30 (m, 2H).

HRMS (ESI): calc. for C<sub>45</sub>H<sub>56</sub>ClN<sub>5</sub>O<sub>13</sub>S<sub>2</sub>Si [M-2H]<sup>2-</sup>: 500.6392, found: 500.6390.

### 3. NMR spectra

#### 3.1. 4-(*tert*-Butoxycarbonyl)-2-(3-(3-carboxyazetidinium-1-ylidene)-6-(3-carboxyazetidinium-1-yl)-3*H*-xanthen-9-yl)benzoate (2a)

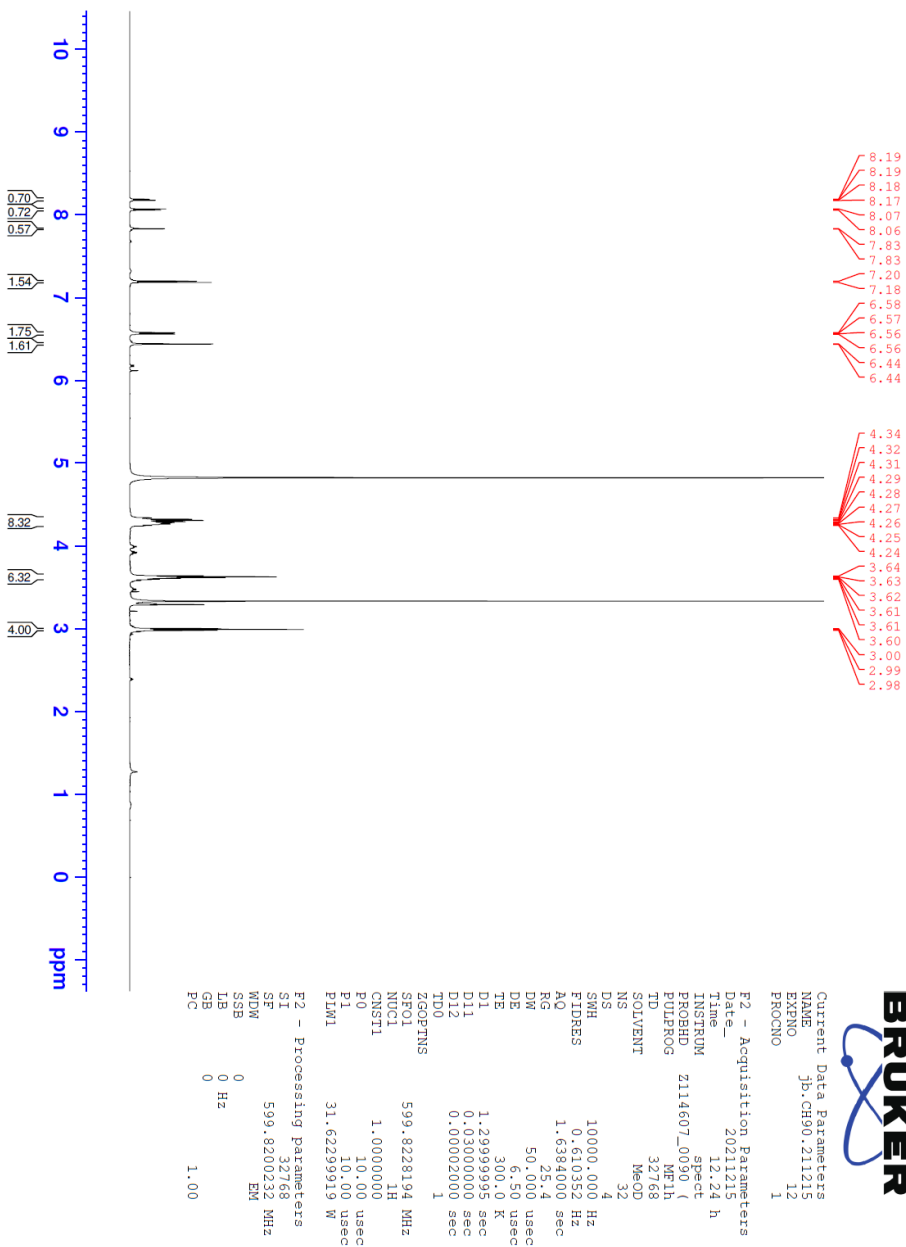

### 3.2. 4-Carboxy-2-(3-(3-((2-sulfoethyl)carbamoyl)azetidin-1-ium-1-ylidene)-6-(3-((2-sulfoethyl)carbamoyl)azetidin-1-yl)-3H-xanthen-9-yl)benzoate (3a)

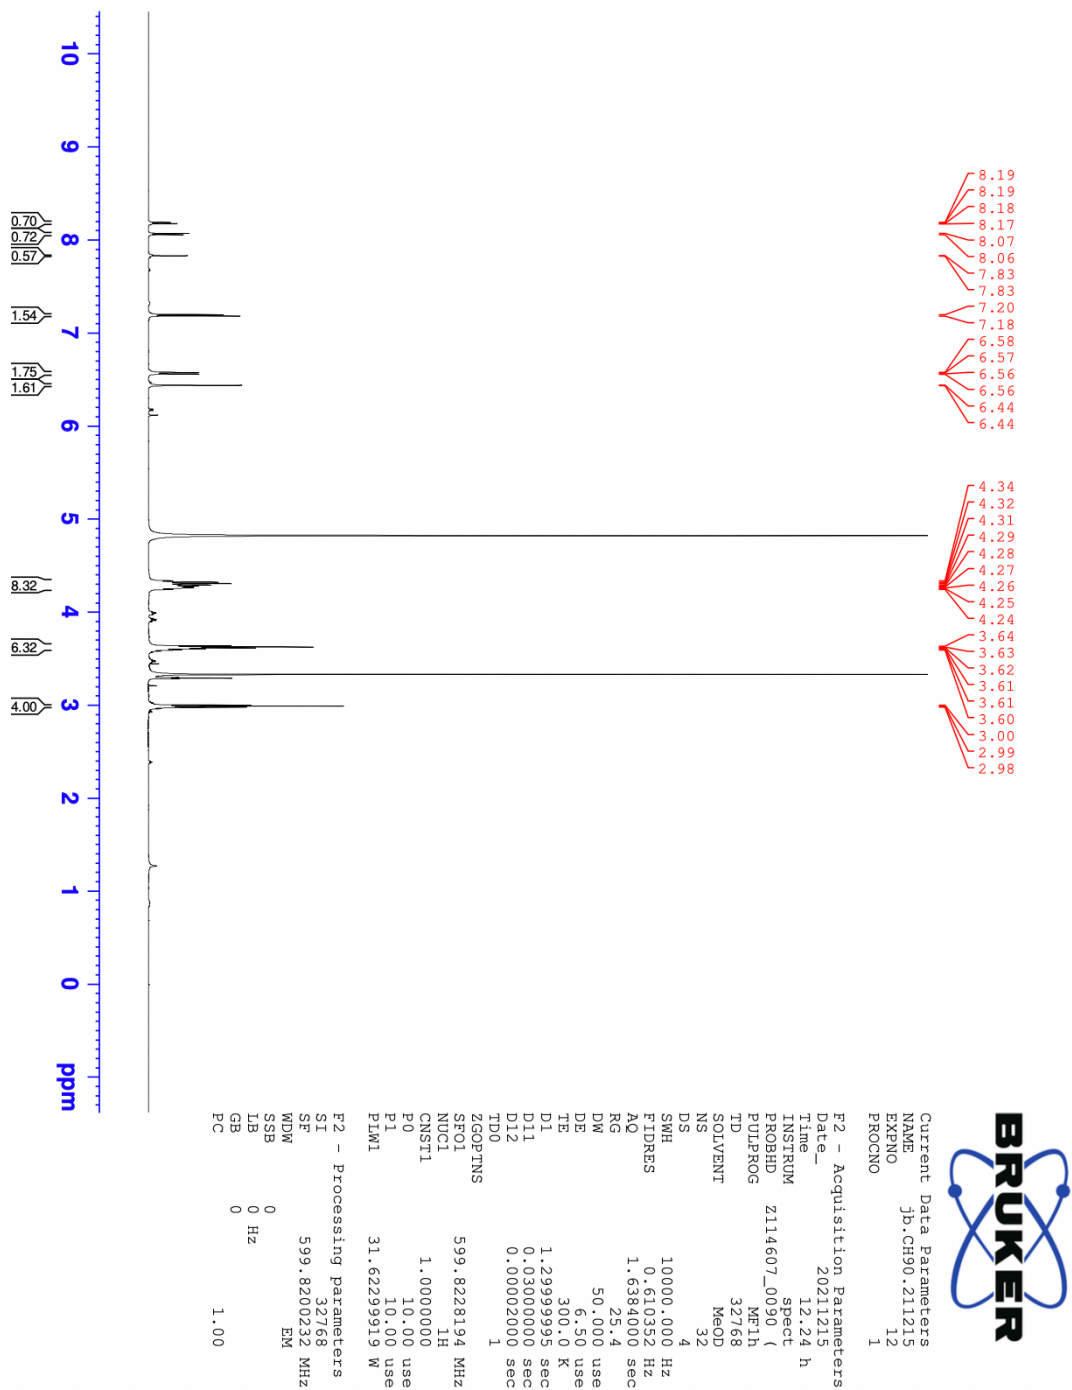

3.3. 4-Carboxy-2-(3-(3-((2-sulfoethyl)carbamoyl)azetidini-1-ylidene)-6-(3-((2-sulfoethyl)carbamoyl)azetidini-1-yl)-3H-xanthen-9-yl)benzoate (3a)4-(((4-(((2-Amino-9H-purin-6-yl)oxy)methyl)benzyl)carbamoyl)-2-(3-(3-((2-sulfoethyl)carbamoyl)azetidini-1-ylidene)-6-(3-((2-sulfoethyl)carbamoyl)azetidini-1-yl)-3H-xanthen-9-yl)benzoate (BG-Sulfo549)

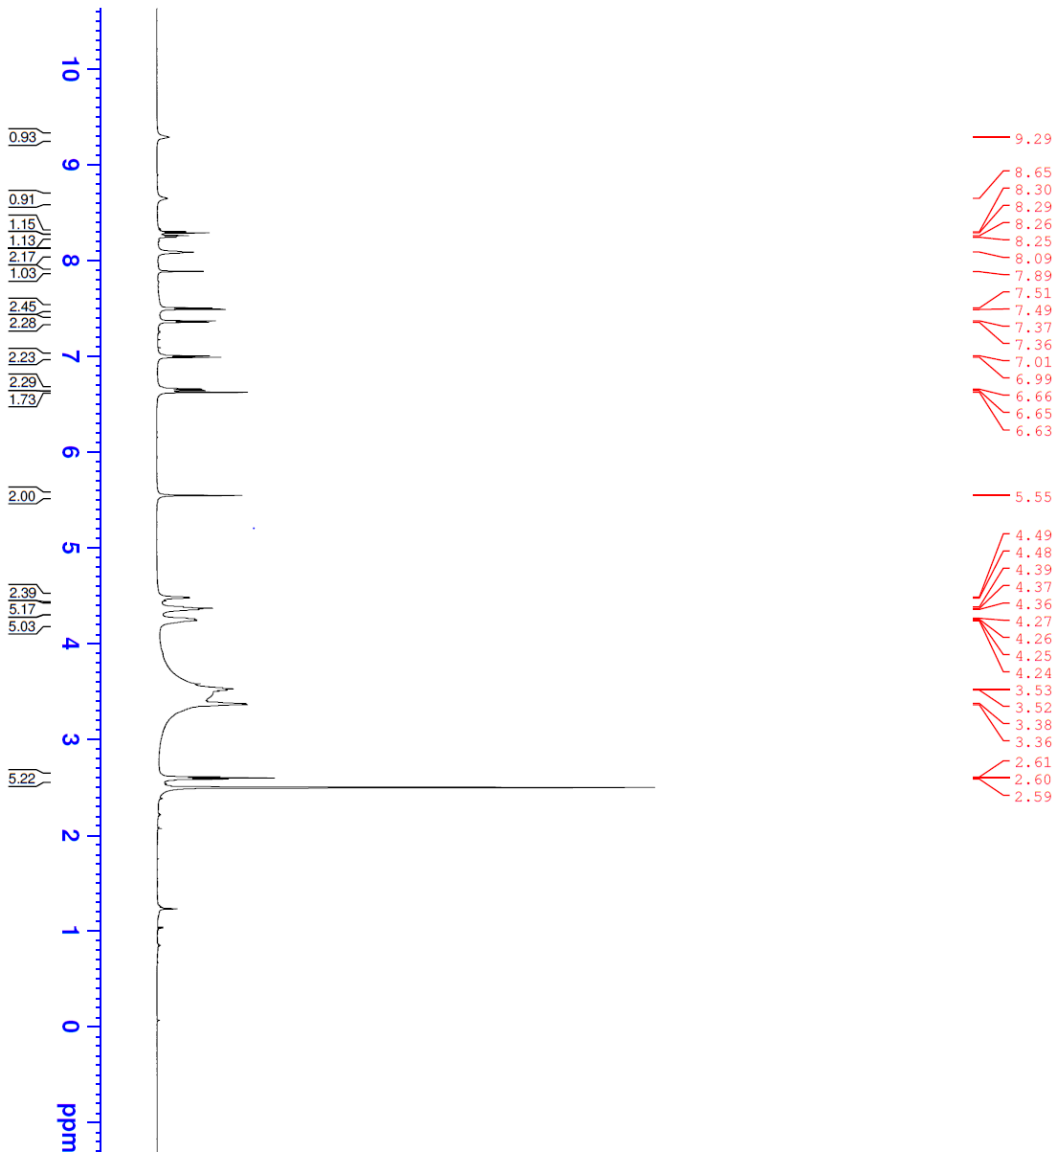

Current Data Parameters  
 NAME CH.CH96\_BSSulfo549\_211217  
 EXPNO 10  
 PROCNO 1

F2 - Acquisition Parameters  
 Date\_ 20211217  
 Time 10.10 h  
 INSTRUM spect  
 PROBHD Z114607\_0090 ( (   
 PULPROG MFlh  
 TD 32768  
 SOLVENT DMSO  
 NS 32  
 DS 2  
 SWH 10000.000 Hz  
 FIDRES 0.610352 Hz  
 AQ 1.638400 sec  
 RG 101  
 DE 50.000 usec  
 DM 6.50 usec  
 TE 300.0 K  
 D1 5.0000000 sec  
 D11 0.0300000 sec  
 D12 0.0000200 sec  
 ZDOPTNS 1  
 SFO1 599.8228194 MHz  
 NUC1 1H  
 CNST1 0.3000000  
 P0 3.00 usec  
 P1 10.00 usec  
 PLWI 31.62299919 W

F2 - Processing parameters  
 SI 32768  
 SF 599.820057 MHz  
 MDW 0  
 TSB 0 Hz  
 GB 0  
 PC 1.00

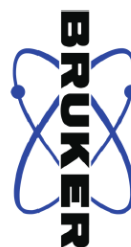

3.4. 4-((2-(2-((6-Chlorohexyl)oxy)ethoxy)ethyl)carbamoyl)-2-(3-(3-((2-sulfoethyl)-carbamoyl)azetidini-um-1-ylidene)-6-(3-((2-sulfoethyl)carbamoyl)azetidini-yl)-3H-xanthen-9-yl)benzoate (CA-Sulfo549)

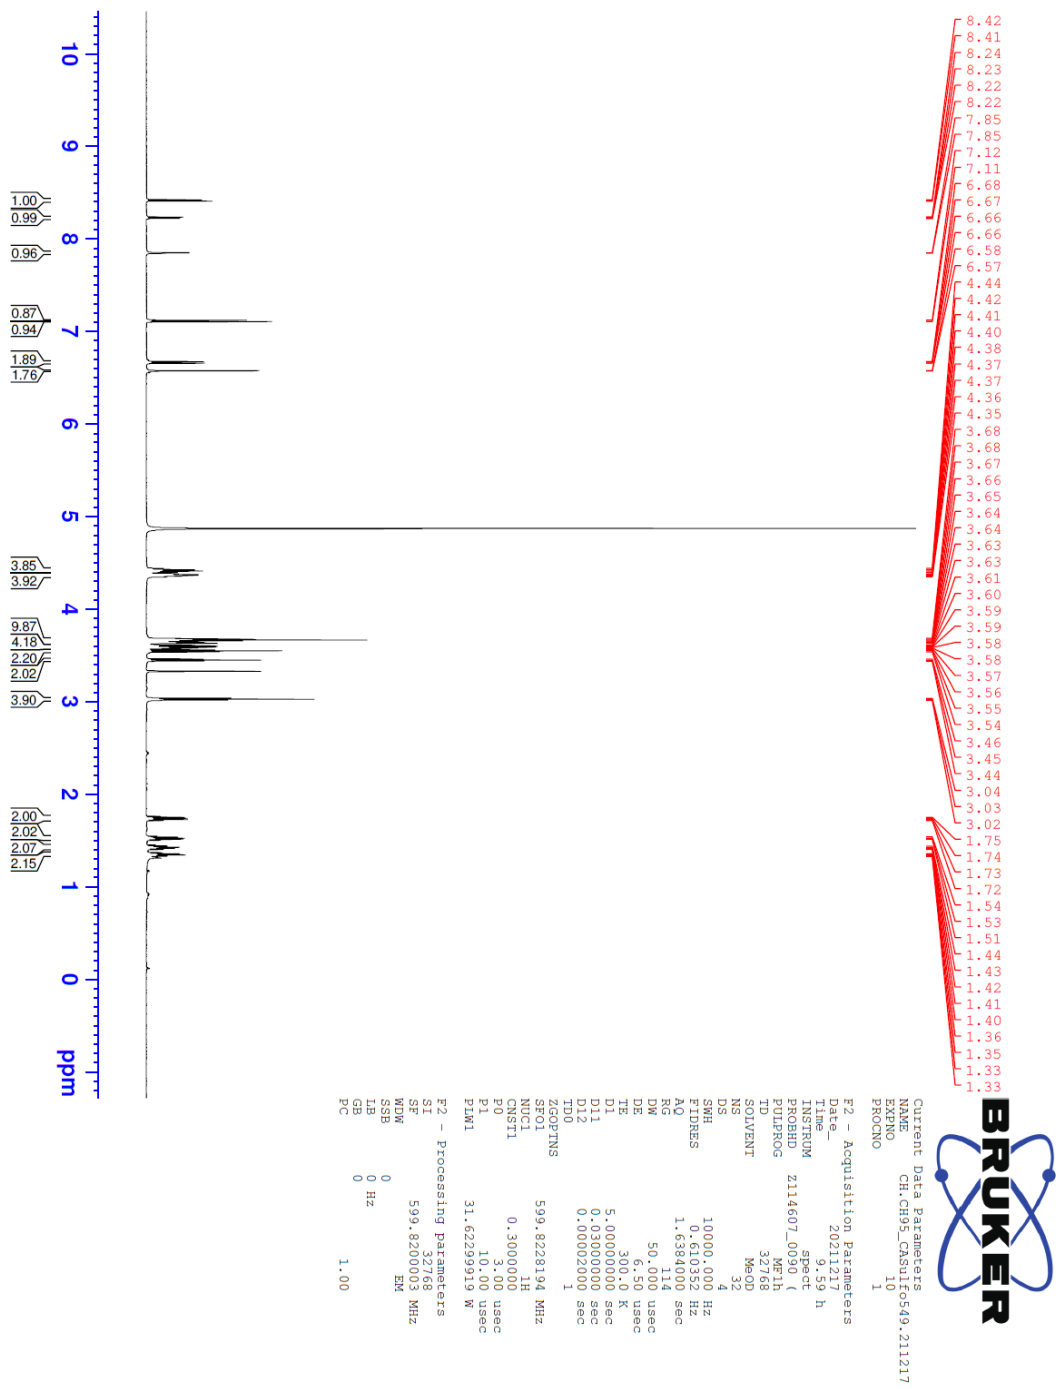

3.5. 4-(*tert*-Butoxycarbonyl)-2-(3-(3-carboxyazetidin-1-ium-1-ylidene)-7-(3-carboxy-azetidin-1-yl)-5,5-dimethyl-3,5-dihydrodibenzo[*b,e*]silin-10-yl)benzoate (2b)

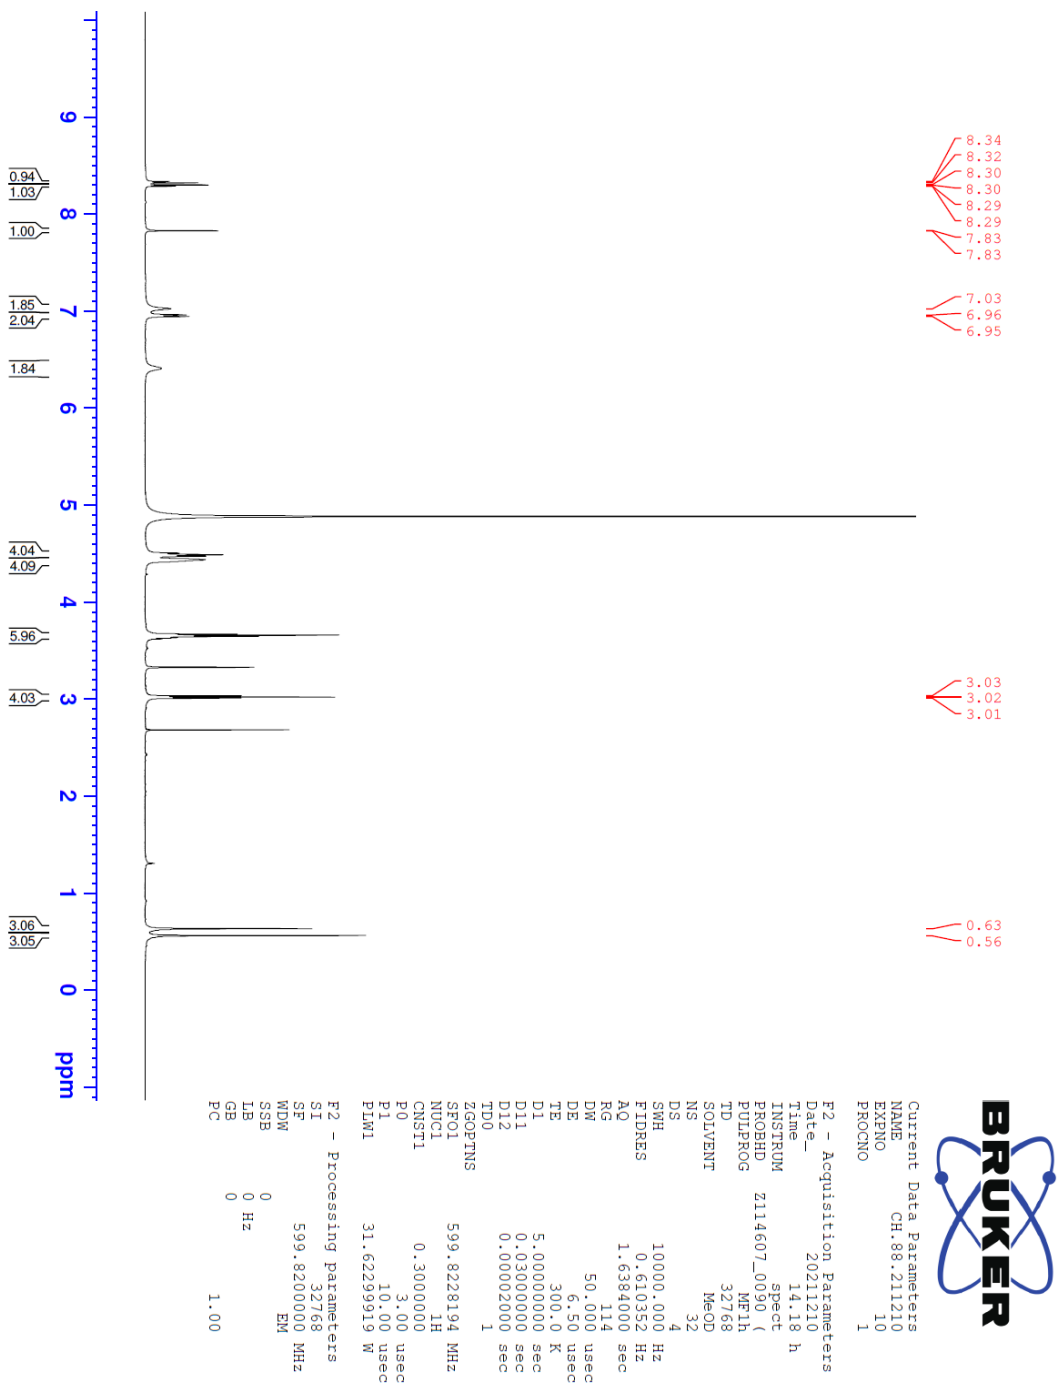

3.6. 4-Carboxy-2-(5,5-dimethyl-3-(3-((2-sulfoethyl)carbamoyl)azetidin-1-ium-1-ylidene)-7-(3-((2-sulfoethyl)carbamoyl)azetidin-1-yl)-3,5-dihydrodibenzo[b,e]silin-10-yl)benzoate (3b)

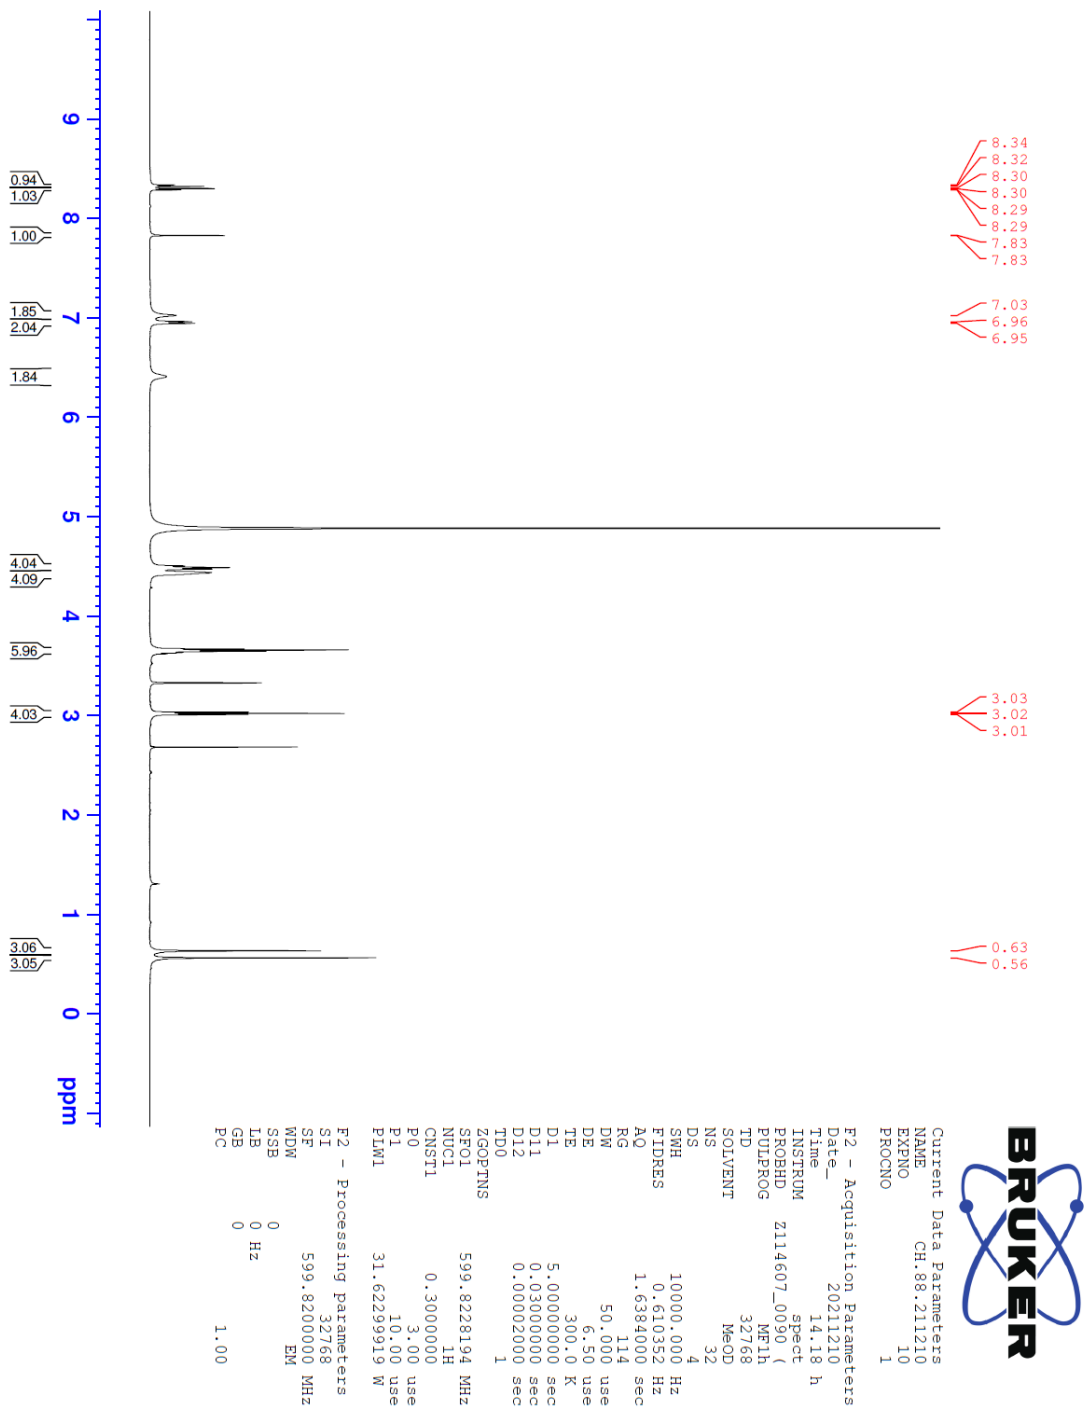

3.7. 4-((4-(2-(2-Amino-9H-purin-6-yl)ethyl)benzyl)carbamoyl)-2-(5,5-dimethyl-3-(3-((2-sulfoethyl)carbamoyl)azetidin-1-ium-1-ylidene)-7-(3-((2-sulfoethyl)-carbamoyl)azetidin-1-yl)-3,5-dihydrodibenzo[*b,e*]silin-10-yl)benzoate (BG-Sulfo646)

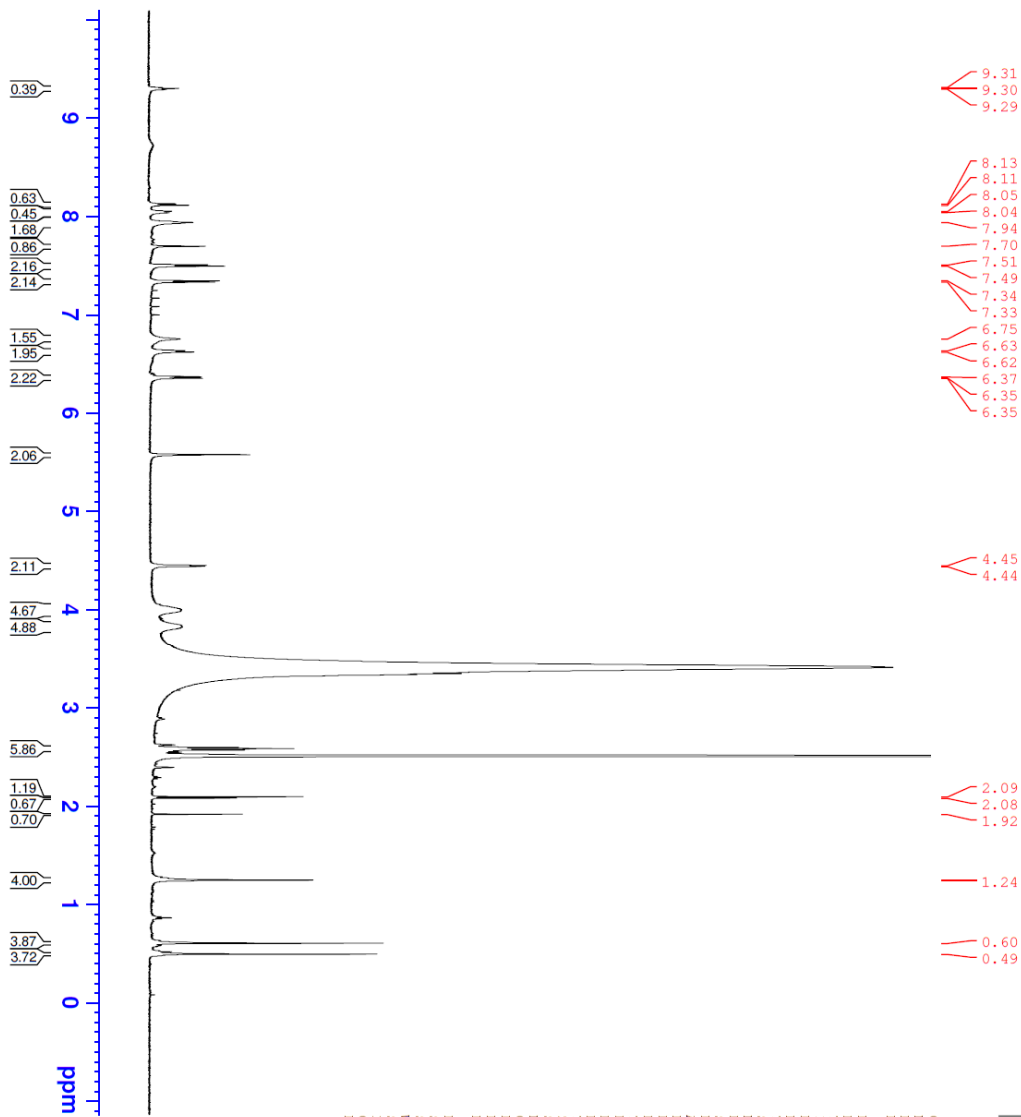

Current Data Parameters  
 NAME CH:CH92\_BESulfo646.211216  
 EXPNO 10  
 PROCNO 1  
 F2 - Acquisition Parameters  
 Date\_ 20211216  
 Time 18:08 h  
 INSTRUM spect  
 PROBHD Z114607\_0090 ( MSLH  
 PULPROG 32768  
 ID DMSO  
 SOLVENT DMSO  
 NS 32  
 DS 2  
 SFO1 10000.000 Hz  
 SRH 0.610352 Hz  
 FIDRES 1.6384000 sec  
 AQ 128  
 RG 50.000 usec  
 DE 6.50 usec  
 TE 300.0 K  
 D1 5.0000000 sec  
 D11 0.0300000 sec  
 D12 0.0002000 sec  
 TDO 1  
 ZGPGTNS 599.8228194 MHz  
 SFO1 NUC1 1H  
 NUC1 CNST1 0.3000000  
 P0 3.00 usec  
 P1 10.00 usec  
 PLWI 31.62299919 W  
 F2 - Processing parameters  
 SI 32768  
 SF 599.8200000 MHz  
 WDW EM  
 SSB 0 Hz  
 LB 0  
 GB 0  
 PC 1.00

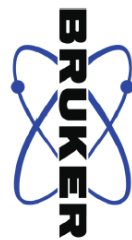



3.8. 4-((2-(2-((6-Chlorohexyl)oxy)ethoxy)ethyl)carbamoyl)-2-(5,5-dimethyl-3-(3-((2-sulfoethyl)carbamoyl)azetidin-1-ium-1-ylidene)-7-(3-((2-sulfoethyl)-carbamoyl)azetidin-1-yl)-3,5-dihydrodibenzo[*b,e*]silin-10-yl)benzoate (CA-Sulfo646)

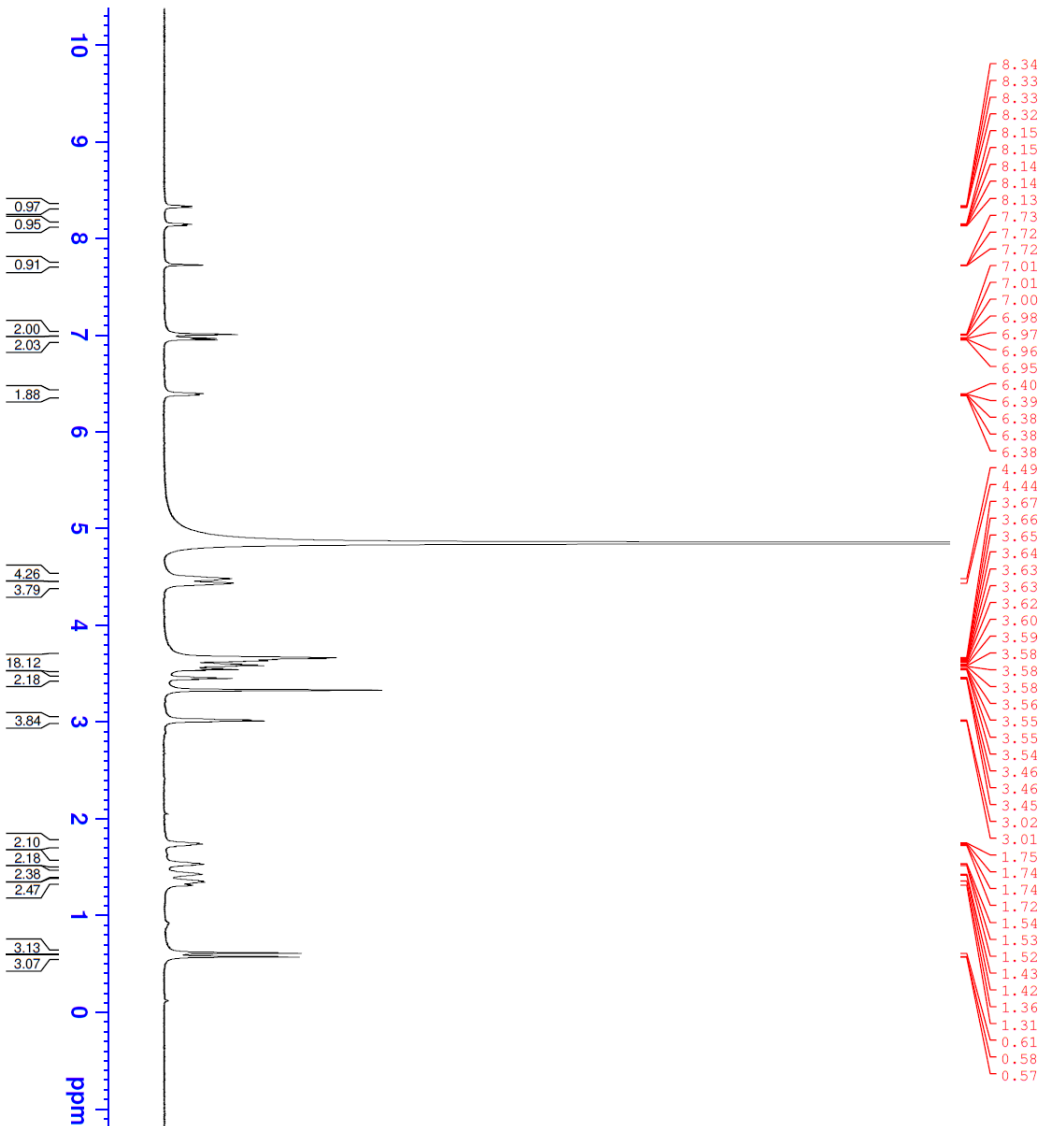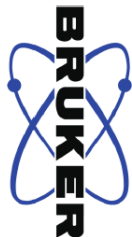

Current Data Parameters  
 NAME CH.CH93\_CASulfo646.211216  
 EXPNO 10  
 PROCNO 1  
 F2 - Acquisition Parameters  
 Date\_ 20211216  
 Time 14:46 h  
 INSTRUM spect  
 PROBRD Z114607\_0090 ( (   
 PULPROG \_MFlh  
 TD 32768  
 SOLVENT MeOD  
 NS 32  
 DS 4  
 SWH 10000.000 Hz  
 FIDRES 0.610352 Hz  
 AQ 1.6384000 sec  
 SFO 121.214  
 DQ 50.000 usec  
 DE 6.50 usec  
 TE 300.0 K  
 D1 5.00000000 sec  
 D11 0.03000000 sec  
 D12 0.00002000 sec  
 TD0 1  
 ZSOPRNS  
 SFO1 599.8228194 MHz  
 SFO2 48  
 CNUST1 0.3000000h  
 P0 3.00 usec  
 P1 10.00 usec  
 P1M1 31.62299919 W  
 F2 - Processing parameters  
 SI 32768  
 SF 599.819972 MHz  
 WDM no  
 SSB 0  
 TB 0 Hz  
 GB 0  
 PC 1.00

#### 4. Protein mass spectrometry

SNAP<sub>f</sub> sequence:

MAS**W**SH**P**Q**F**E**K**G**A**DDDD**K**V**P**HMDKDCEMKR**T**TLDSPLGKLELSGCEQGLHRIIFLGKGTSAADAVEVPAP  
AAVLGGPEPLMQATAWLNAYFHQPEAIEEFVVPALHHPVFQQESFTRQVLWKLKLVVVFGEVISYSHLAA  
LAGNPAATAAVKTALSGNPVPIIPCHR**V**VQGDLDVGGYEGGLAVKEWLLAHEGHRLGKPGLGAPGFSS**I**  
SA**H**H**H**H**H**H**H**H**H**H

Strep-Tag II, Enterokinase-site, SNAP<sub>f</sub>, His-Tag

After His-tag purification, two posttranslational SNAP<sub>f</sub> constructs were observed: one with removed start codon SNAP<sub>f</sub> (2–222) and one without the N-terminal Strep-Tag II and Enterokinase-site SNAP<sub>f</sub> (22–222):

|                                              | calc.     | found     | Δ ppm |
|----------------------------------------------|-----------|-----------|-------|
| SNAP <sub>f</sub> (2–222)                    | 23865.101 | 23865.141 | 1.67  |
| SNAP <sub>f</sub> (22–222)                   | 21618.103 | 21618.142 | 1.80  |
| SNAP <sub>f</sub> (2–222):JF <sub>549</sub>  | 24420.317 | 24420.357 | 1.65  |
| SNAP <sub>f</sub> (22–222):JF <sub>549</sub> | 22173.319 | 22173.349 | 1.36  |
| SNAP <sub>f</sub> (2–222):JF <sub>646</sub>  | 24462.386 | 24462.386 | 0.00  |
| SNAP <sub>f</sub> (22–222):JF <sub>646</sub> | 22215.358 | 22215.386 | 1.72  |
| SNAP <sub>f</sub> (2–222):Sulfo549           | 24722.305 | 24722.340 | 1.43  |
| SNAP <sub>f</sub> (22–222):Sulfo549          | 22475.307 | 22475.337 | 1.35  |
| SNAP <sub>f</sub> (2–222):Sulfo646           | 24764.334 | 24764.387 | 2.16  |
| SNAP <sub>f</sub> (22–222):Sulfo646          | 22517.336 | 22517.387 | 2.28  |

Halo sequence:

M**H**H**H**H**H**H**H**H**H**H**H**ENLYFQ**G**IGTG**F**PFDPHYVEVLGERM**H**YVDV**G**PRD**G**TPV**L**FLHGNPTSSYVWRNIIP**H**V  
AP**T**HR**C**IAPDLIGMGKSDK**P**DLGYFFDDHVR**F**MDAFIEALGLEEV**V**LVIHDWGSALGFHWAKRNP**E**RVK**G**  
IA**F**ME**F**IR**P**IP**T**WDEWPEFA**R**ET**F**Q**A**F**R**T**D**VGR**K**LI**D**Q**N**V**F**IE**G**TL**P**MG**V**VR**P**L**T**EV**E**MD**H**Y**R**EP**F**LN  
P**V**D**R**E**P**L**W**R**F**P**N**EL**P**IAGE**P**AN**I**VAL**V**E**E**Y**M**D**W**L**H**Q**S**P**V**P**K**LL**F**W**G**T**P**G**V**L**I**P**P**AE**A**AR**L**AK**S**L**P**N**C**K**A**V  
D**I**G**P**GL**N**LL**Q**ED**N**PD**L**IG**S**E**I**AR**W**L**S**T**L**E**I**

Halo, His-Tag

|                        | calc.     | found     | Δ ppm |
|------------------------|-----------|-----------|-------|
| Halo                   | 35465.901 | 35465.985 | 2.37  |
| Halo:JF <sub>549</sub> | 36089.251 | 36089.293 | 1.16  |
| Halo:JF <sub>646</sub> | 36131.230 | 36131.297 | 1.85  |
| Halo:Sulfo549          | 36391.188 | 36391.291 | 2.83  |
| Halo:Sulfo646          | 36433.217 | 36433.317 | 2.74  |

## 5. Protein constructs

SNAP–TM–Halo sequence:

METDTLLLWVLLLWVPGSTGDY<sup>Y</sup>PDV<sup>P</sup>PDY<sup>Y</sup>AGAQP<sup>A</sup>PARSM<sup>M</sup>DKDCEMKR<sup>R</sup>TTLDSPLGKLELSGCEQGLHEI<sup>I</sup>IFLGKGTSAADAVEVPAPAAVLGGPEPLMQATAWLNAYFHQPEAIEEF<sup>F</sup>PVPALHHPV<sup>V</sup>FQQESFTRQVLW<sup>W</sup>KLLKVVKFGEVISYSHLAALAGNPAATAAVKTALSGNPV<sup>V</sup>PILIPCHR<sup>R</sup>VVQGDLDVGGYEGGLAVKEWLLAHEG<sup>G</sup>HRLGK<sup>K</sup>PGLGGRLEVL<sup>L</sup>FQGVDE<sup>E</sup>Q<sup>Q</sup>K<sup>K</sup>L<sup>L</sup>ISEEDLNAV<sup>V</sup>GQDTQE<sup>E</sup>VIVVPHSLP<sup>P</sup>FKV<sup>V</sup>VVISAILALV<sup>V</sup>LTII<sup>I</sup>ISLII<sup>I</sup>LIMLW<sup>W</sup>Q<sup>Q</sup>KKPRGAQP<sup>A</sup>PARSG<sup>S</sup>SEIGTGF<sup>F</sup>PFDPHYVEVLGERM<sup>M</sup>HYVDV<sup>V</sup>GPRDGT<sup>T</sup>PVLF<sup>L</sup>HLGNPTSS<sup>S</sup>YVWR<sup>R</sup>NI<sup>I</sup>IPHVAP<sup>P</sup>THRCIAPDLIG<sup>G</sup>MKSDK<sup>K</sup>PD<sup>D</sup>LG<sup>G</sup>YFFDDH<sup>H</sup>VR<sup>R</sup>FMDAFIEALGLEEV<sup>V</sup>LV<sup>V</sup>IHDWGSALGFHWAKRN<sup>N</sup>PERV<sup>V</sup>KGIAFM<sup>M</sup>E<sup>E</sup>FI<sup>I</sup>RPI<sup>P</sup>TWDEWPEFARETFQAF<sup>F</sup>R<sup>R</sup>TTDVGR<sup>R</sup>KLI<sup>I</sup>DQNV<sup>V</sup>FIG<sup>G</sup>TLPMGV<sup>V</sup>VR<sup>R</sup>PLTEVEMDHYRE<sup>E</sup>FLNPVDREPLW<sup>W</sup>RFPNELPIAGEPANIVALVEEYMDWLHQSPVPKLLFWGTPGV<sup>V</sup>LIPPAEAARLAKSLPNCKAVDIGPGLNLLQEDNPD<sup>D</sup>LIGSEIARWLSTLEISGVD\*

IgK signal peptide, HA-tag, SNAP, myc, transmembrane domain, Halo-Tag

Halo–TM–SNAP sequence:

METDTLLLWVLLLWVPGSTGDY<sup>Y</sup>PDV<sup>P</sup>PDY<sup>Y</sup>AGAQP<sup>A</sup>PARSG<sup>S</sup>SEIGTGF<sup>F</sup>PFDPHYVEVLGERM<sup>M</sup>HYVDV<sup>V</sup>GPRDGT<sup>T</sup>PVLF<sup>L</sup>HLGNPTSS<sup>S</sup>YVWR<sup>R</sup>NI<sup>I</sup>IPHVAP<sup>P</sup>THRCIAPDLIG<sup>G</sup>MKSDK<sup>K</sup>PD<sup>D</sup>LG<sup>G</sup>YFFDDH<sup>H</sup>VR<sup>R</sup>FMDAFIEALGLEEV<sup>V</sup>LV<sup>V</sup>IHDWGSALGFHWAKRN<sup>N</sup>PERV<sup>V</sup>KGIAFM<sup>M</sup>E<sup>E</sup>FI<sup>I</sup>RPI<sup>P</sup>TWDEWPEFARETFQAF<sup>F</sup>R<sup>R</sup>TTDVGR<sup>R</sup>KLI<sup>I</sup>DQNV<sup>V</sup>FIG<sup>G</sup>TLPMGV<sup>V</sup>VR<sup>R</sup>PLTEVEMDHYRE<sup>E</sup>FLNPVDREPLW<sup>W</sup>RFPNELPIAGEPANIVALVEEYMDWLHQSPVPKLLFWGTPGV<sup>V</sup>LIPPAEAARLAKSLPNCKAVDIGPGLNLLQEDNPD<sup>D</sup>LIGSEIARWLSTLEISG<sup>G</sup>VE<sup>E</sup>Q<sup>Q</sup>K<sup>K</sup>L<sup>L</sup>ISEEDLNAV<sup>V</sup>GQDTQE<sup>E</sup>VIVVPHSLP<sup>P</sup>FKV<sup>V</sup>VVISAILALV<sup>V</sup>LTII<sup>I</sup>ISLII<sup>I</sup>LIMLW<sup>W</sup>Q<sup>Q</sup>KKPRGAQP<sup>A</sup>PARSM<sup>M</sup>DKDCEMKR<sup>R</sup>TTLDSPLG<sup>G</sup>KLELSGCEQGLHEI<sup>I</sup>IFLGKGTSAADAVEVPAPAAVLGGPEPLMQATAWLNAYFHQPEAIEEF<sup>F</sup>PVPALHHP<sup>P</sup>VFQQESFTRQVLW<sup>W</sup>KLLKVVKFGEVISYSHLAALAGNPAATAAVKTALSGNPV<sup>V</sup>PILIPCHR<sup>R</sup>VVQGDLDVGGYEGGLAVKEWLLAHEGHRLGK<sup>K</sup>PGLGGRLEVL<sup>L</sup>FQGV<sup>V</sup>D\*

IgK signal peptide, HA-tag, Halo-Tag, myc, transmembrane domain, SNAP

Halo-GLP1R sequence:

MALPVTALLPLALLLHAARPA<sup>A</sup>ASG<sup>G</sup>IDYK<sup>K</sup>DDDDKAGIDAIGSEIGTGF<sup>F</sup>PFDPHYVEVLGERM<sup>M</sup>HYVDV<sup>V</sup>GPRDGT<sup>T</sup>PVLF<sup>L</sup>HLGNPTSS<sup>S</sup>YVWR<sup>R</sup>NI<sup>I</sup>IPHVAP<sup>P</sup>THRCIAPDLIG<sup>G</sup>MKSDK<sup>K</sup>PD<sup>D</sup>LG<sup>G</sup>YFFDDH<sup>H</sup>VR<sup>R</sup>FMDAFIEALGLEEV<sup>V</sup>LV<sup>V</sup>IHDWGSALGFHWAKRN<sup>N</sup>PERV<sup>V</sup>KGIAFM<sup>M</sup>E<sup>E</sup>FI<sup>I</sup>RPI<sup>P</sup>TWDEWPEFARETFQAF<sup>F</sup>R<sup>R</sup>TTDVGR<sup>R</sup>KLI<sup>I</sup>DQNV<sup>V</sup>FIG<sup>G</sup>TLPMGV<sup>V</sup>VR<sup>R</sup>PLTEVEMDHYRE<sup>E</sup>FLNPVDREPLW<sup>W</sup>RFPNELPIAGEPANIVALVEEYMDWLHQSPVPKLLFWGTPGV<sup>V</sup>LIPPAEAARLAKSLPNCKAVDIGPGLNLLQEDNPD<sup>D</sup>LIGSEIARWLSTLEISGDIRPQGATVSLWETVQKWREYRRQCQRSLTEDPPPATDLFCNRTFDEYACWPDGEPGSFVNVSCPWYLPWASSVPQGHVYRFCTAEG<sup>G</sup>LWLQKDNSSLPWRDLSECEESKR<sup>R</sup>GERSSPEEQ<sup>Q</sup>LLFLYIIYTVGYALSFSALVIASAILLGRHLHCTRNYIHLNLFASFILRALS<sup>S</sup>VFIKDAALKW<sup>W</sup>MYSTAAQQHQWDGLLSYQDSLSCRLVFLMQYCVAANYWLLVEGVYLYTLLAFSVLSEQWIFRLYVSIGWGVPLLFVVPWGIVKYLYEDEGCWTRNSNMNYWLIIRLPI<sup>I</sup>LFAIGV<sup>V</sup>NFLIFVRVICIVVSKLKANLMCKTDIKCRLAKSTLTLIPLLGTHEVIFAFVMDEHARGTLRFIKLFTELSFTSFQGLMVAI<sup>I</sup>LYCFVNNEVQLEFRKSWERWRLEHLHIQRDSSMKPLKCP<sup>P</sup>TSSLSGATAGSSMYTATCQASCS\*

CD8 signal peptide, FLAG-tag, Halo-tag, GLP1R

## 6. Supplemental Figures

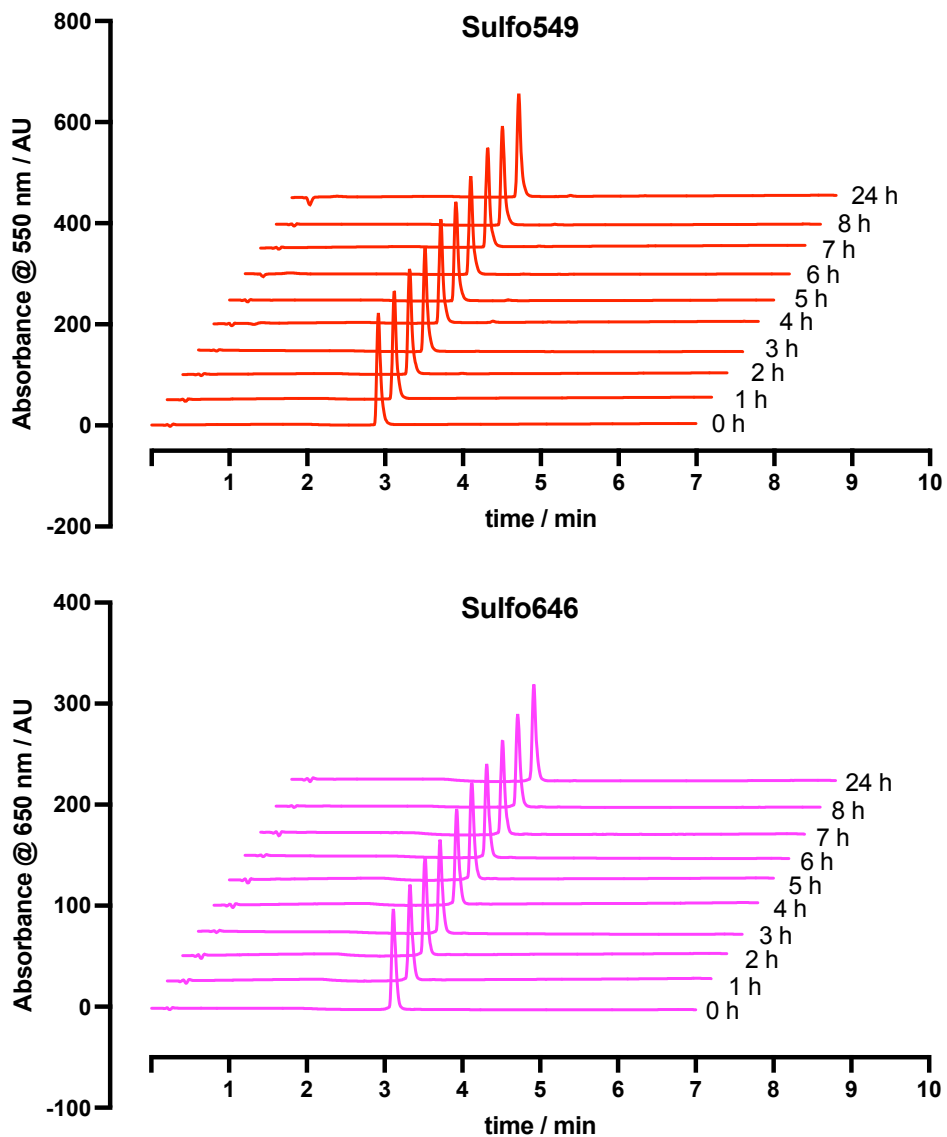

Supplemental Figure S1: Stability of Sulfo549 and Sulfo646 in PBS measured by LCMS over 24 hours.

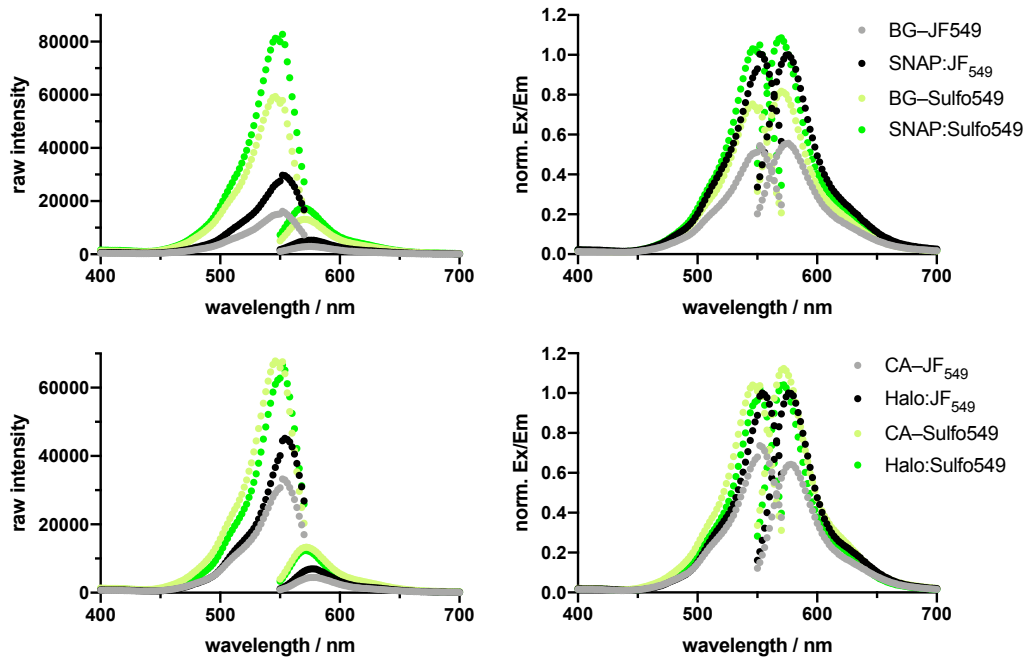

Supplemental Figure S2: Excitation and emission spectra of bound and unbound 549 probes with raw intensity (left) and normalized to JF dye excitation and emission (right, cf. Figure 2).

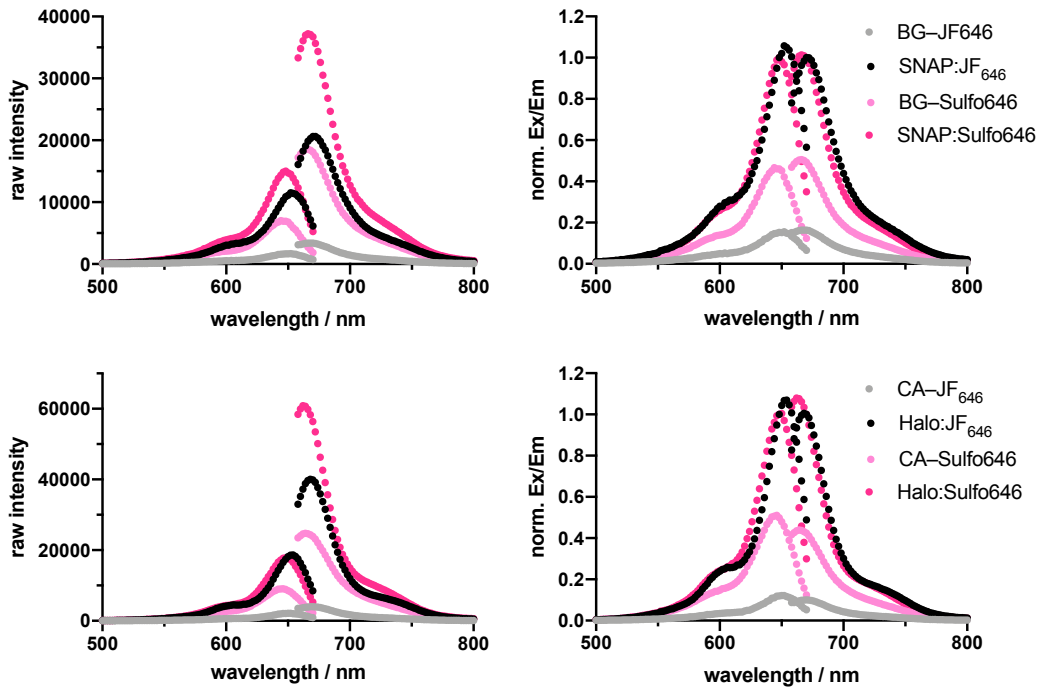

Supplemental Figure S3: Excitation and emission spectra of bound and unbound 646 probes with raw intensity (left) and normalized to JF dye excitation and emission (right, cf. Figure 2).

**A**

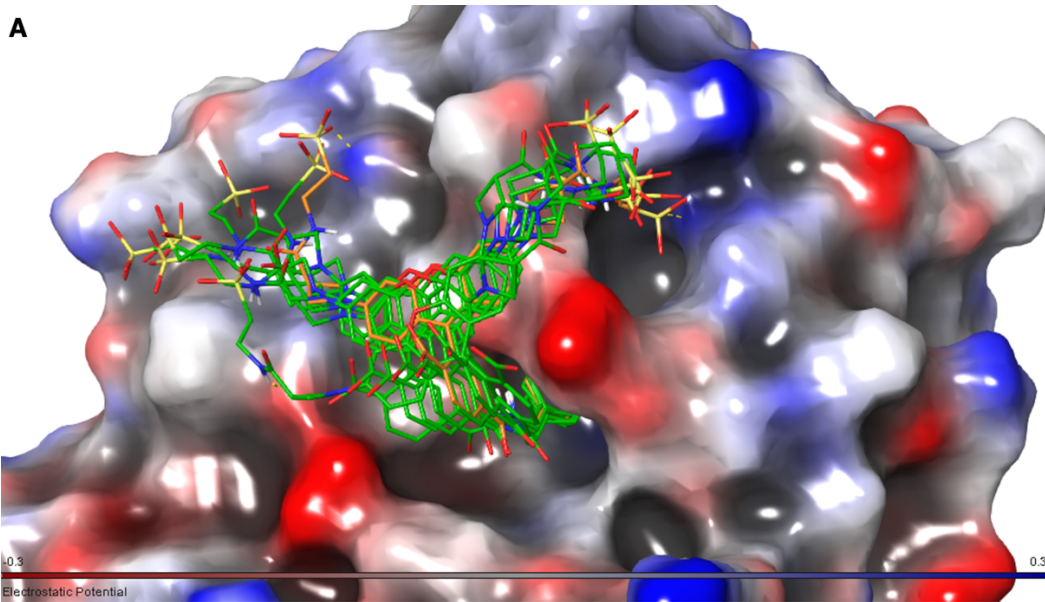

**B**

**Ligand Interaction Diagram  
SNAP:Sulfo549**

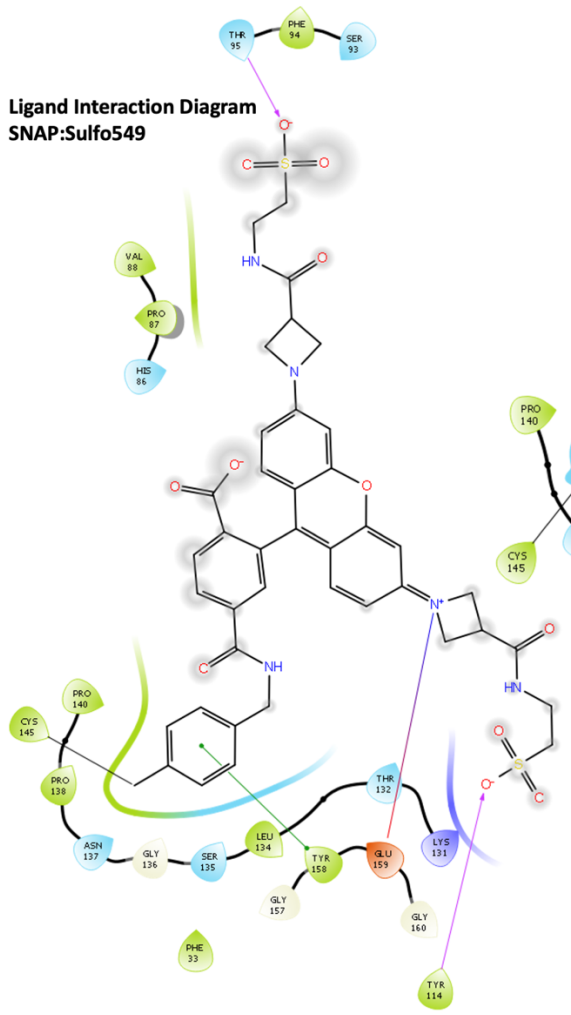

**C**

**Ligand Interaction Diagram 6Y8P-PDB-Ligand  
SNAP:TMR**

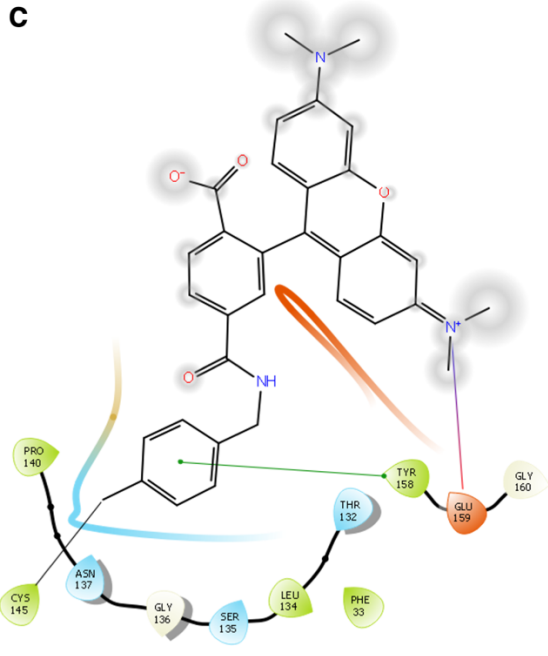

**Supplemental Figure S4: Molecular docking of Sulfo549.** **A)** Electrostatic potential surface show 8 out of 10 poses with good overlap. Pose 1: orange C atoms; hydrogen bonds to the sulfonates from Thr95 and Tyr114 are dashed yellow. **B)** Several new interactions predicted between Sulfo549 ligand with the SNAP protein surface that TMR could not make and is not observed in the X-ray structure pdb: 6y8p.

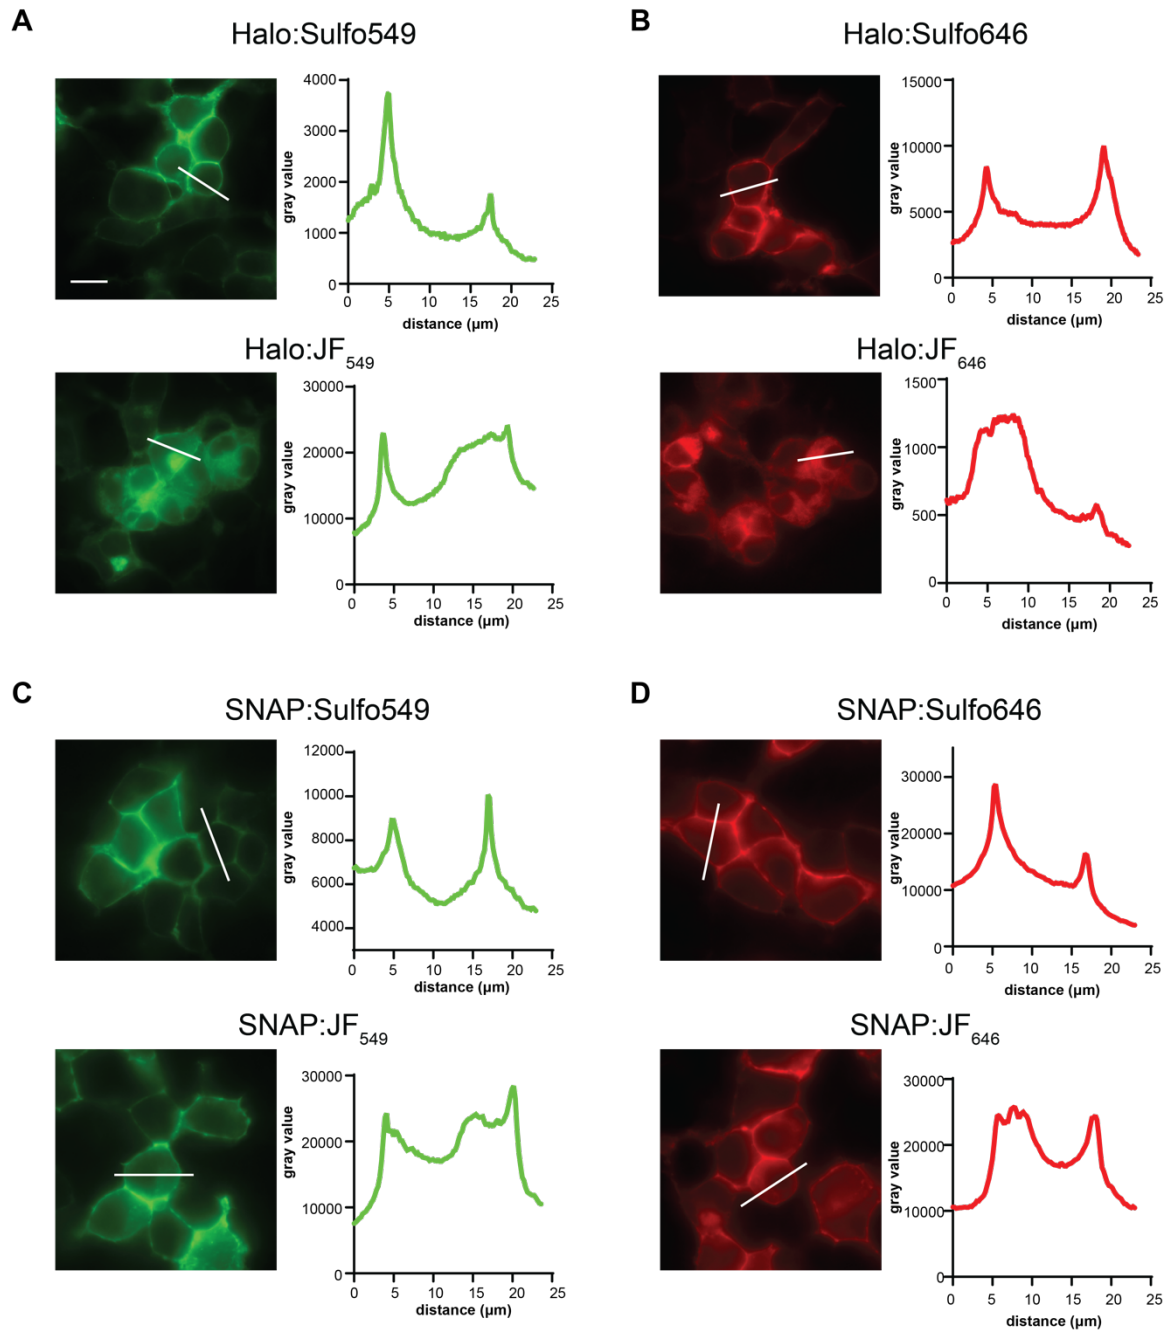

**Supplemental Figure S5: HEK293 cells transfected with SNAP- or Halo- $\beta$ 2AR and labelled with JaneliaFluor or Sulfo Dyes. A) Halo- $\beta$ 2AR transfected cells stained with CA-Sulfo549 vs. CA-JF<sub>549</sub>. B) Halo- $\beta$ 2AR transfected cells stained with CA-Sulfo646 vs. CA-JF<sub>646</sub>. C) SNAP- $\beta$ 2AR transfected cells stained with BG-Sulfo549 vs. BG-JF<sub>549</sub>. D) SNAP- $\beta$ 2AR transfected cells stained with BG-Sulfo646 vs. BG-JF<sub>646</sub>. Scale bar = 10  $\mu$ m.**



## 7. Supplemental Schemes

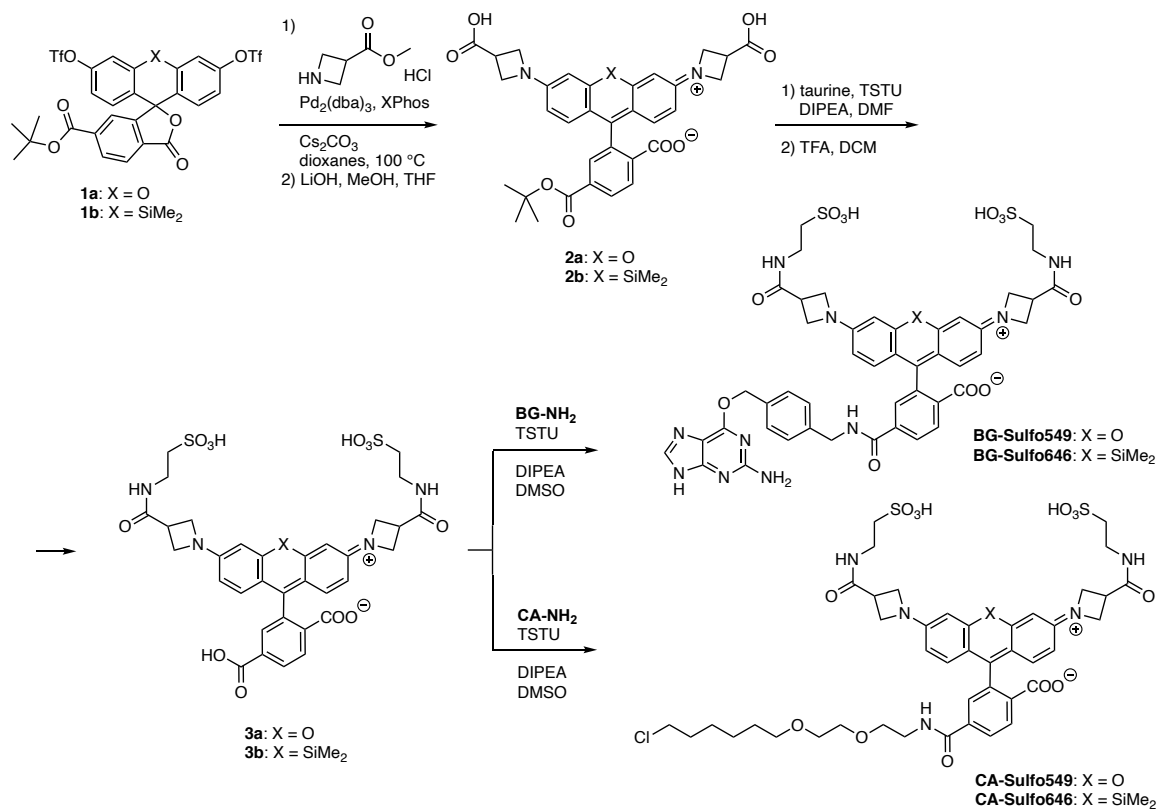

Supplemental Scheme 1: Synthesis of Sulfo dyes.

## 8. References

- [1] A. Acosta-Ruiz, V. A. Gutzeit, M. J. Skelly, S. Meadows, J. Lee, P. Parekh, A. G. Orr, C. Liston, K. E. Pleil, J. Broichhagen, J. Levitz, *Neuron* **2020**, *105*, 446-463.
